# Supplementary material for: Genome-wide sequencing of longan (Dimocarpus longan Lour.) provides insights into molecular basis of its polyphenol-rich characteristics
Source: PubMed Central journal article supplement (PMC5467034; doi:10.1093/gigascience/gix023), 2017-03-28

1  
2 **Genome-wide sequencing of longan (*Dimocarpus longan* Lour.)**  
3  
4 **provides insights into molecular basis of its polyphenol-rich**  
5  
6 **characteristics**  
7  
8  
9

10  
11 YuLing Lin<sup>1\*</sup>, JiuMeng Min<sup>2\*</sup>, RuiLian Lai<sup>1</sup>, ZhangYan Wu<sup>2</sup>, YuKun Chen<sup>1</sup>, LiLi Yu<sup>2</sup>,  
12  
13 ChunZhen Cheng<sup>1</sup>, YuanChun Jin<sup>2</sup>, QiLin Tian<sup>1</sup>, QingFeng Liu<sup>2</sup>, WeiHua Liu<sup>1</sup>,  
14  
15 ChengGuang Zhang<sup>2</sup>, LiXia Lin<sup>1</sup>, YanHu<sup>2</sup>, DongMin Zhang<sup>1</sup>, MinKyaw Thu<sup>1</sup>, ZiHao  
16  
17 Zhang<sup>1</sup>, ShengCai Liu<sup>1</sup>, ChunShui Zhong<sup>1</sup>, XiaoDong Fang<sup>2</sup>, Jian Wang<sup>2,3</sup>, Huanming  
18  
19 Yang<sup>2,3</sup>, Rajeev K Varshney<sup>4,5&</sup>, YeYin<sup>2&</sup>, ZhongXiong Lai<sup>1&</sup>  
20  
21  
22  
23  
24  
25

26 <sup>1</sup>Institute of Horticultural Biotechnology, Fujian Agriculture and Forestry University,  
27  
28 Fuzhou, Fujian 350002, China  
29  
30

31 <sup>2</sup>BGI-Shenzhen, Shenzhen 518083, China  
32  
33

34 <sup>3</sup>James D. Watson Institute of Genome Sciences, Hangzhou 310058, China  
35  
36

37 <sup>4</sup>International Crops Research Institute for the Semi-Arid Tropics (ICRISAT),  
38  
39 Hyderabad, India  
40  
41

42 <sup>5</sup>School of Plant Biology, The University of Western Australia, Crawley, Perth,  
43  
44 Australia  
45  
46

47 \*Equal contributor  
48  
49

50 & Corresponding authors  
51  
52  
53  
54  
55  
56  
57  
58  
59  
60  
61  
62  
63  
64  
65

**Email addresses:**

1  
2 YLL: buliang84@163.com  
3

4 JMM: [minjm@genomics.cn](mailto:minjm@genomics.cn)  
5

6 RLL: [1044612364@qq.com](mailto:1044612364@qq.com)  
7

8 ZYW: [Joanna.wu@genomics.cn](mailto:Joanna.wu@genomics.cn)  
9

10 YKC: [cyk68@163.com](mailto:cyk68@163.com)  
11

12 LLY: [yulili@bgitechsolutions.com](mailto:yulili@bgitechsolutions.com)  
13

14 CZC: [405553272@qq.com](mailto:405553272@qq.com)  
15

16 YCJ: [jinyuanchun@genomics.cn](mailto:jinyuanchun@genomics.cn)  
17

18 QLT: [563430138@qq.com](mailto:563430138@qq.com)  
19

20 QFL: [liuqingfeng@bgitechsolutions](mailto:liuqingfeng@bgitechsolutions.com)  
21

22 WHL: [695471647@qq.com](mailto:695471647@qq.com),  
23

24 CGZ: [zhangchengguang@genomics.cn](mailto:zhangchengguang@genomics.cn)  
25

26 LXL: [907466498@qq.com](mailto:907466498@qq.com)  
27

28 YH: [ewa.hu@bgitechsolutions.com](mailto:ewa.hu@bgitechsolutions.com)  
29

30 DMZ: [419418882@qq.com](mailto:419418882@qq.com)  
31

32 MKT: [1175025328@qq.com](mailto:1175025328@qq.com)  
33

34 ZHZ: [zhangzihao863@126.com](mailto:zhangzihao863@126.com)  
35

36 SCL: [1215698900@qq.com](mailto:1215698900@qq.com)  
37

38 CSZ: [291768260@qq.com](mailto:291768260@qq.com)  
39

40 XDF: [fangxd@genomics.cn](mailto:fangxd@genomics.cn)  
41

42 JW: [wangjian@genomics.org.cn](mailto:wangjian@genomics.org.cn)  
43

44 HMY: [hmyang@genetics.ac.cn](mailto:hmyang@genetics.ac.cn)  
45

46 RKV: R.K.Varshney@CGIAR.ORG  
47

48 YY: [yinye@genomics.cn](mailto:yinye@genomics.cn)  
49

50 ZXL: [laizx01@163.com](mailto:laizx01@163.com)  
51  
52  
53  
54  
55  
56  
57  
58  
59  
60  
61  
62  
63  
64  
65

## Abstract

**Background:** Longan (*Dimocarpus longan* Lour.), an important subtropical fruit in the family *Sapindaceae*, is grown in more than ten countries. Longan is an edible drupe fruit and a source of traditional medicine with polyphenol-rich traits. Tree size, alternate bearing, and witches' broom disease still pose serious problems. To gain insights into the genomic basis of longan traits, a draft genome sequence was assembled.

**Results:** The draft genome (about 471.88 Mb) of a China longan cultivar, 'Honghezi', was estimated to contain 31,007 genes and 261.88 Mb of repetitive sequences. No recent whole-genome wide duplication event was detected in the genome. Whole-genome resequencing and analysis of 13 cultivated *D. longan* accessions revealed the extent of genetic diversity. Comparative transcriptome studies combined with genome-wide analysis revealed polyphenol-rich and pathogen-resistance characteristics. Genes involved in secondary metabolism, especially those from significantly expanded (*DHS*, *SDH*, *F3'H*, *ANR*, and *UFGT*) and contracted (*PAL*, *CHS*, and *F3'5'H*) gene families with tissue-specific expression, may be important contributors to the high accumulation levels of polyphenolic compounds observed in longan fruit. The high number of genes encoding nucleotide-binding site leucine-rich repeat (NBS-LRR) and leucine-rich repeat receptor-like kinase proteins, and the recent expansion and contraction of the NBS-LRR family suggested a genomic basis for resistance to insects, fungus, and bacteria in this fruit tree.

**Conclusions:** These data provide insights into the evolution and diversity of the

1 longan genome. The comparative genomic and transcriptome analyses provided  
2  
3 information about longan-specific traits, particularly genes involved in its polyphenol-  
4  
5 rich and pathogen- resistance characteristics.  
6  
7

8  
9  
10 **Keywords:** longan genome; genetic diversity; polyphenols biosynthesis; pathogen  
11  
12 resistance  
13

## 14 15 16 **Background**

17  
18 *Dimocarpus longan* Lour. (*D. longan*) originated from South China or Southeast Asia  
19  
20 and is commonly called longan or ‘dragon eye’ in Asia. It is an important  
21  
22 tropical/subtropical evergreen fruit tree that has a diploid genome ( $2n=2x=30$ ) and  
23  
24 belongs to the family Sapindaceae. Longan is widely cultivated in Southeast Asia,  
25  
26 South Asia, Australia, and Hawaii [1]. China's longan acreage and production rank  
27  
28 first, accounting for 70% and more than 50% of the world's acreage and production,  
29  
30 respectively [2]. As an edible drupe fruit and source of traditional medicine, longan is  
31  
32 grown in most areas of Southern China, including Guangdong, Guangxi, Fujian,  
33  
34 Sichuan, Yunnan, and Hainan [3]. Traditionally, longan leaves, flowers, fruit, and  
35  
36 seeds all have been widely used as traditional Chinese medicines for several diseases,  
37  
38 including leucorrhea, kidney disorders, allergies, cancer, diabetes, and cardiovascular  
39  
40 disease, because they contain bioactive compounds such as phenolic acids, flavonoids,  
41  
42 and polysaccharides [4-6]. However, tree size, alternate bearing, and witches' broom  
43  
44 disease still pose serious problems in longan production [1]. Cultivar identification  
45  
46 and characterization are the first steps for fruit introduction and breeding  
47  
48 improvement [7]. In China, there are more than 300 longan varieties; most are  
49  
50  
51  
52  
53  
54  
55  
56  
57  
58  
59  
60  
61  
62  
63  
64  
65

1 landraces and farm varieties, although a few wild populations exist in Hainan,  
2  
3 Guangdong, Guangxi, and Yunnan provinces [7, 8]. However, only 30–40 varieties  
4  
5 are grown commercially worldwide. Longan breeding improvement via conventional  
6  
7 breeding strategies has been hindered by its long juvenility, genetic heterozygosity,  
8  
9 and plant size [1]. To identify cultivars and improve longan breeding, knowledge of  
10  
11 the longan genetic background is required.  
12  
13  
14  
15

16  
17 Recently, many draft genome sequences for fruit trees have become available,  
18  
19 including papaya (*Carica papaya*) [9], grape (*Vitis vinifera*) [10], apple (*Malus*  
20  
21 *domestica*) [11], plum (*Prunus mume*) [12], orange (*Citrus sinensis*) [13], peach  
22  
23 (*Prunus persica*) [14], pear (*Pyrus bretschneideri*) [15], kiwifruit (*Actinidia chinensis*)  
24  
25 [16], pineapple (*Ananas comosus*) [17], banana (*Musa acuminata*) [18], jujube  
26  
27 (*Ziziphus jujuba*) [19], and strawberry (*Fragaria vesca*) [20]. However, draft genome  
28  
29 sequences are still lacking for the subtropical and tropical fruits of the Sapindaceae  
30  
31 family. The Sapindaceae family, known as the Soapberry family, is part of the  
32  
33 dominant plants in the tree layer of the tropical rain forests; it includes the subtropical  
34  
35 and tropical fruits (longan, *Litchi chinensis*, and *Nephelium lappaceum*), the important  
36  
37 bioenergy plant soapberry (*Sapindus mukorossi*), and the woody oil plant brook  
38  
39 feather (*Xanthoceras sorbifolia*). To accelerate improved breeding and utilization of  
40  
41 the Sapindaceae family, a fundamental understanding of its complete genome  
42  
43 sequence is crucial. Longan, as one of famous fruit trees in Sapindaceae family, was  
44  
45 selected for genome sequencing in this study. Here, we report the draft genome  
46  
47 sequence of the longan cultivar ‘Honghezi’ (HHZ) ( $2n=2x=30$ ) and the extent of  
48  
49  
50  
51  
52  
53  
54  
55  
56  
57  
58  
59  
60  
61  
62  
63  
64  
65

1 genetic diversity in this species based on whole genome re-sequencing of 13  
2  
3 cultivated *D. longan* accessions. Comparative transcriptome studies combined with  
4  
5 genome-wide analysis provided insights into the structure and evolution of the longan  
6  
7 genome, the molecular mechanisms of the biosynthesis of polyphenol, and the  
8  
9 pathogen resistance of longan. Together, these results provided insights into the  
10  
11 evolution and diversity of the longan genome, and will help to improve the efficiency  
12  
13 of longan conventional breeding by integrating biotechnological tools.  
14  
15  
16  
17  
18  
19

## 20 **Results**

### 21 **Genome sequencing and assembly**

22  
23 We selected the *D. longan* ‘HHZ’ cultivar for genome sequencing. In brief, a total of  
24  
25 316.84 Gb of raw data was generated by Illumina sequencing of 12 genome shotgun  
26  
27 libraries with different fragment lengths ranging from 170 bp to 40 kb (Additional file  
28  
29 1: Table S1). After stringent filtering and correction steps, a total of 121.68 Gb of  
30  
31 high-quality sequence data, representing 273.44-fold coverage of the entire genome,  
32  
33 were obtained (Additional file 1: Table S2). Based on K-mer frequency methods [21],  
34  
35 the *D. longan* genome was estimated to be 445 Mb with a 0.88% heterozygosity rate  
36  
37 (Additional file 2: Fig. S1, Additional file 1: Table S3). Compared with other  
38  
39 sequenced fruit trees genomes, the *D. longan* genome was bigger than papaya [9],  
40  
41 orange [13], peach [14], and plum [12], and smaller than grape [10], apple [11], pear  
42  
43 [15], pineapple [17], and kiwifruit [16]. Longan trees are generally thought to have  
44  
45 highly heterozygous traits. The estimated 0.88% heterozygosity rate in the whole  
46  
47 genome of the longan ‘HHZ’ cultivar is reported here for the first time. This  
48  
49  
50  
51  
52  
53  
54  
55  
56  
57  
58  
59  
60  
61  
62  
63  
64  
65

1 heterozygosity rate is higher than the rates reported for kiwifruit (0.536%) [16], plum  
2  
3 (0.03%) [12, 22], and poplar (about 0.5%) [23], and lower than the rates for pear (1–  
4  
5  
6 2% sequence divergence) [15] and pineapple (1.89% in F153, 1.98% in MD2, 2.93%  
7  
8  
9 in CB5) [17]. These results imply that the idea that fruit trees always have high  
10  
11 heterozygosity may be due to artificial grafting and/or asexual reproduction.  
12

13  
14 Using the SOAPdenovo program [24], all the high-quality reads were assembled into  
15  
16 51,392 contigs and 17,367 scaffolds ( $\geq 200$  bp) totaling 471.88 Mb excluding gaps  
17  
18 (Table 1). These assembled sequences accounted for approximately 106.04% of the  
19  
20 estimated longan genome, which conflicts with previously reported genome  
21  
22 assemblies where the sequences accounted for less than 100% of the estimated  
23  
24 genome [13-15]. The higher percentage might be due to the high heterozygosity of the  
25  
26 longan genome, suggesting that, in the future, a single- molecule sequencing  
27  
28 technology should be used to correct the longan genome assembly. Here, the N50s of  
29  
30 contigs and scaffolds were 26.04 kb (longest, 173.29 kb) and 566.63 kb (longest,  
31  
32 6942.32 kb), respectively (Table 1), suggesting the high quality of the assembly. The  
33  
34 GC content of the *D. longan* genome was 33.7%, which is comparable with the GC  
35  
36 content of the genomes of pineapple (33%) [17], jujube (33.41%) [19], and orange  
37  
38 (34.06%) [13], but lower than the GC content of the genomes of kiwifruit (35.2%)  
39  
40 [16], papaya (35.3%) [9], and grape (36.2%) [10] (Table 2, Additional file 2: Fig. S2).  
41  
42  
43 Analysis of the percent GC content among different fruit trees can provide important  
44  
45 clues about gene density, gene expression, replication timing, recombination, and  
46  
47 evolutionary relationships [25]. The GC-depth graph and distribution indicated no  
48  
49  
50  
51  
52  
53  
54  
55  
56  
57  
58  
59  
60  
61  
62  
63  
64  
65

1 contamination of any bacterial sequence in the longan genome assembly, and 99.2%  
2  
3 of the assembly was sequenced with more than 20× coverage (Additional file 2: Fig.  
4  
5  
6 S3). The statistics and comparison of the *D. longan* assembly with 12 other twelve  
7  
8 fruit tree genomes are shown in detail in Table 2. The quality of the assembly was  
9  
10 assessed by aligning the scaffolds to a longan transcriptome assembly from the NCBI  
11  
12 Sequence Read Archive (SRA) [SRA050205]. Of the 96,251 longan transcriptome  
13  
14 sequences ( $\geq 100$ ) reported previously [26], 97.55% were identified in the genome  
15  
16 assembly (Additional file 1: Table S4), confirming the high quality of the assembly.  
17  
18  
19  
20  
21

### 22 **BUSCO analysis**

23  
24  
25 We further evaluated the quality and completeness of the draft longan genome  
26  
27 assembly using the BUSCO (Benchmarking Universal Single-Copy Orthologs)  
28  
29 datasets [27]. Of the total of 956 BUSCO ortholog groups searched in the longan  
30  
31 assembly, 900 (94%) BUSCO genes were “complete single-copy”, 288 (30%) were  
32  
33 “complete duplicated”, 16 (1.6%) were “fragmented”, and 40 (4.1%) were “missing”  
34  
35  
36 (Additional file 1: Tables S5). The percentage of missing BUSCO genes was  
37  
38 comparable to the percentages missing in the assemblies of banana (3%), *Brassica*  
39  
40 *napus* (3%), and Arabidopsis (2%), which have served as well-assembled standards at  
41  
42 the chromosomal level [28], further suggesting the high quality of our assembly.  
43  
44  
45  
46  
47  
48  
49

### 50 **Repetitive elements and gene annotation**

51  
52  
53 Repetitive elements are major components of eukaryotic genomes, and they have been  
54  
55 used extensively to analyze genome structure, karyotype, ploidy, and evolution. In the  
56  
57 longan assembly, we found a total of 261.88 Mb (52.87%, 445 Mb) was repetitive  
58  
59  
60  
61  
62  
63  
64  
65



1 sequences (Additional file 1: Table S6), which is higher than the amount observed in  
2  
3 orange (20%, 367 Mb) [13], peach (29.6%, 265 Mb) [14], kiwifruit (36%, 758 Mb)  
4  
5 [16], pineapple (38.3%, 526 Mb) [17], grape (41.4%, 475 Mb) [10], jujuba (49.49%,  
6  
7 444 Mb) [10], and papaya (51.9%, 372 Mb) [9], and lower than the amount reported  
8  
9 in pear (53.1%, 527 Mb) [15] and apple (67.4%, 742.3 Mb) [11] (Table 2), indicating  
10  
11 that the size of fruit tree genomes differed as a result of the variable amounts of  
12  
13 repetitive elements that they contained. Accordingly, the bigger plant genomes often  
14  
15 possessed higher percentages of repetitive elements than the smaller plant genomes.  
16  
17 Most plant genomes appear to contain abundant long-terminal repeat (LTR)  
18  
19 retrotransposons and a small number of short interspersed elements (SINEs) and long  
20  
21 interspersed elements (LINEs) [29]. We found that the repetitive fraction of the  
22  
23 longan genome comprised LTR retrotransposons, which were the most abundant  
24  
25 (36.54%), and SINEs (2.43%) and LINEs (0.04%), which were the least abundant;  
26  
27 other repeats, including tandem repeats and unknown repeats, made up 7.59% and  
28  
29 7.71% of the repetitive fraction, respectively (Additional file 1: Table S7). A large  
30  
31 number of the unknown repetitive sequences may be longan-specific. The  
32  
33 characterization of repetitive sequences is of primary importance for understanding  
34  
35 the structure and evolution of the longan genome.  
36  
37  
38  
39  
40  
41  
42  
43  
44  
45  
46  
47  
48

49 Using a combination of *de novo* prediction, homology-based searches, and a  
50  
51 transcriptome assembly, we predicted a total of 39,282 genes yielding a set of 31,007  
52  
53 high-quality proteins in the longan genome. The average gene size was 3,266.02 bp,  
54  
55 the average length of the coding sequence was 1,232.18 bp, and the average number  
56  
57  
58  
59  
60  
61  
62  
63  
64  
65

1 of exons per gene was 4.68 (Additional file 1: Table S8). The number of genes  
2  
3 predicted in the longan genome was close to the number of genes predicted in jujube  
4  
5 (32,808) [10], higher than in papaya (24,746) [9], pineapple (27,024) [17], peach  
6  
7 (27,852) [14], orange (29,445) [13], and grape (30,434) [10], and lower than in  
8  
9 kiwifruit (39,040) [16], pear (42,812) [15], and apple (57,386) [11]. This analysis  
10  
11 showed that the number of genes in the longan genome was similar to the numbers  
12  
13 found in other sequenced fruit tree genomes of equivalent size, and also indicated that  
14  
15 the bigger plant genomes usually contained higher numbers of genes. Of 31,007  
16  
17 protein-coding genes, 27,862 (89.86%) had TrEMBL homologs, 22,986 (74.13 %) had  
18  
19 SwissProt homologs, and 23,398 (75.46%) had InterPro homologs (Additional file 1:  
20  
21 Table S9). A total of 1,611 putative transcription factors (TFs) distributed in 64  
22  
23 families were identified, which represented 4.1% of the genes in the longan genome  
24  
25 (39,282). The percentage of TFs in longan genome was close to the percentages  
26  
27 reported in strawberry (4.6%) [20], and rice (4.8 %), but lower than the percentages in  
28  
29 Arabidopsis (6%), kiwifruit (6.2%) [16], grape (6.7%) [30], poplar (6.7%), and  
30  
31 banana (11.75%) [18]. In the longan genome, the largest numbers of genes encoded  
32  
33 TFs in the following TF families: MYB (186 genes), ERF (115), MADS (109), NAC  
34  
35 (107), bHLH (107), C2H2 (98), B3 superfamily (86), HB (71), WRKY(58), bZIP  
36  
37 (55), GRAS (52), and C3H (49) (Supplemental EXCEL File 1). The identification of  
38  
39 these TFs will help to lay a solid foundation for functional verification of longan traits  
40  
41 in the future. Among the non-coding genes detected in the longan genome assembly,  
42  
43 we identified 359 microRNAs, 212 rRNA, 506 tRNAs, and 399 small nuclear RNAs  
44  
45  
46  
47  
48  
49  
50  
51  
52  
53  
54  
55  
56  
57  
58  
59  
60  
61  
62  
63  
64  
65

1 (Additional file 1: Table S10).  
2

### 3 **Gene family evolution and comparison** 4

5  
6 Orthologous clustering analysis was conducted with the longan genome and eight  
7  
8 other selected plant genomes, Arabidopsis, orange, papaya, grapevine, banana, peach,  
9  
10 kiwifruit, and apple. Of the 31,007 protein-coding genes in the genome, 26,261 were  
11  
12 grouped into 14,961 gene families (763 of which were longan-unique families) giving  
13  
14 an average of 1.76 genes per family (Additional file 1: Table S11). The remaining  
15  
16 5,834 genes were classed as un-clustered genes. Among the 31,007 genes, 4,653 were  
17  
18 longan-unique paralogs, 5,184 were multiple-copy orthologs, 3,606 were single-copy  
19  
20 orthologs, and 12,818 were other orthologs (Fig. 1b). Comparative analysis of the  
21  
22 longan genome with eight other selected plant genomes indicated that the number of  
23  
24 gene families in the longan genome was similar to the numbers in the genomes of  
25  
26 orange (15,000) [13] and peach (15,326) [14], higher than in banana (12,519) [18],  
27  
28 Arabidopsis (13,406), grape (13,570) [10], kiwifruit (13,702) [16], and papaya  
29  
30 (13,763) [9], and lower than in apple (17,740) [11] (Fig. 1b, Additional file 1: Table  
31  
32 S11). These comparisons indicated that differences in gene families in plant genomes  
33  
34 may be important sources of genetic traits and adaptation in different species.  
35  
36 Comparative analysis of the longan genome with the genomes of citrus, banana,  
37  
38 peach, and Arabidopsis showed that these five species contained a core set of 9,215  
39  
40 genes in common, whereas 1,207 genes were specific to longan, which is more than  
41  
42 the numbers of genes specific to citrus and Arabidopsis, and lower than the numbers  
43  
44 specific to *M. acuminata* and peach (Fig. 1d).  
45  
46  
47  
48  
49  
50  
51  
52  
53  
54  
55  
56  
57  
58  
59  
60  
61  
62  
63  
64  
65

1 Expansion or contraction of gene families may provide clues to the evolutionary  
2 forces that have shaped plant genomes and have an important role in the  
3 diversification of plants. In this study, we used CAFÉ [31] to identify gene families  
4 that had potentially undergone expansion or contraction in the longan genome. We  
5 found a total of 2,849 expanded gene families and 2,842 contracted families; however,  
6 only 386 expanded families (7,839 genes) and 12 contracted families (53 genes),  
7 accounting for 19.96% and 0.13% of the total coding genes (39,282), respectively,  
8 were found to be statistical significant at  $P < 0.05$  (Supplemental EXCEL Files 2 and  
9 3). The genes in the significantly expanded and contracted families ( $P < 0.05$ ) were  
10 annotated with gene ontology (GO) terms. Genes in a total of 32 (expanded) and 11  
11 (contracted) families were assigned GO terms under the three GO categories,  
12 biological process, cellular component, and molecular function. Almost all the  
13 expanded or contracted families contained genes that were assigned terms under  
14 biological process, and a few genes in the contracted families were assigned terms  
15 under the cellular component and molecular function categories (Additional file 2:  
16 Fig. S4a, b). The dominant terms in the expanded or contracted gene families were  
17 ‘cellular component organization’, ‘locomotion’, ‘auxiliary transport protein’, and  
18 ‘binding’, revealing important clues to the evolutionary forces that may have shaped  
19 the longan genomes.

## 20 **Genome evolution**

21 Whole-genome duplication is common in most plant species and it represents an  
22 important molecular mechanism that has shaped modern plant karyotypes [32].

1 Characterization and annotation of the longan genome provided comprehensive  
2  
3 information for us to further investigate the evolutionary history of longan. Single-  
4  
5 copy nuclear genes from orange, Arabidopsis, cacao (*Theobroma cacao*), poplar  
6  
7 (*Populus trichocarpa*), grape, apple, papaya, soybean, peach, kiwifruit, and banana  
8  
9 [18] were used in a genome-scale phylogenetic analysis using the maximum likelihood  
10  
11 method. The phylogenetic analysis showed that longan was phylogenetically closest  
12  
13 to orange, close to papaya, Arabidopsis, and cacao, and most distant from  
14  
15 monocotyledon fruits (banana). From the phylogenetic tree, we estimated that longan  
16  
17 diverged about 69.3 million years ago (Fig. 1a). To determine the nature of the  
18  
19 evolutionary events that led to the modern longan genome structure, we analyzed the  
20  
21 syntenic relationships between longan and poplar. We detected a total of 2,106 and  
22  
23 883 syntenic blocks containing 17,901 and 17,447 colinear genes for longan and  
24  
25 poplar, respectively (Additional file 1: Table S12), which supported the reported  
26  
27 conserved colinearity and close evolutionary relationship in these two plant species.  
28  
29 To further analyze the evolutionary divergence and the relative age of duplication  
30  
31 events in longan and other related species, we calculated the distance–transversion  
32  
33 rates at fourfold degenerate sites (4DTv) (Fig. 1c). The 4DTv value peaked at 0.5 for  
34  
35 paralog pairs in grape, highlighting the recent whole-genome duplication in this  
36  
37 species. Two 4DTv values that peaked at 0.72 and 0.6 for orthologs between longan  
38  
39 and banana, and between longan and Arabidopsis, respectively, supported species  
40  
41 divergence. These results are consistent with the more ancient divergence between  
42  
43 [monocotyledons](#) and dicotyledons. The orthologs between longan and grape, longan  
44  
45  
46  
47  
48  
49  
50  
51  
52  
53  
54  
55  
56  
57  
58  
59  
60  
61  
62  
63  
64  
65

1 and peach, and longan and orange showed 4DTv distances peaks at 0.36, 0.36, and  
2  
3 0.26, respectively, which is consistent with the 4DTv peaks reported previously for  
4  
5 Vitaceae and Rosaceae species, and more ancient than the 4DTv values for Rutaceae  
6  
7 or [Sapindaceae](#). In longan, the analysis showed ancient duplication events (the 4DTv  
8  
9 peak at about 0.55) but did not reveal a recent whole-genome duplication. These  
10  
11 results complement the results for the longan genome and will contribute to studies  
12  
13 into ancestral forms and arrangements of plant genes [33].  
14  
15  
16  
17  
18  
19

### 20 **Assessment of genetic diversity in longan germplasm**

21  
22 A representative characteristic of longan cultivars is their high heterozygosity, which  
23  
24 has resulted in the low efficiency of longan germplasm management and utilization.  
25  
26 Traditionally, molecular markers (RAPD, AFLP, SCAR, SCTP, and SRAP) and  
27  
28 single nucleotide polymorphisms (SNPs) based on transcriptome data [34] have been  
29  
30 used for accurate identification of longan varieties. However, the extent of  
31  
32 heterozygosity in the whole genome is not well understood [7]. The availability of the  
33  
34 longan draft genome provided the foundation for a comprehensive assessment of  
35  
36 heterozygosity in the longan genome.  
37  
38  
39  
40  
41  
42  
43

44 We selected 13 representative commercially cultivated accessions with early-  
45  
46 maturing, middle-maturing, late-maturing, multiple-flowering, aborted-seeded, and  
47  
48 disease- resistant characteristics for whole-genome resequencing (Additional file 1:  
49  
50 Table S13). A total of 45.77 Gb of raw data were generated by Illumina sequencing.  
51  
52 After alignment of the clean reads corresponding to 5.02- to 7.31-fold depths and  
53  
54 >78% coverage to the reference genome (Additional file 1: Table S14), we identified  
55  
56  
57  
58  
59  
60  
61  
62  
63  
64  
65

1 357,737 SNPs (Additional file 1: Table S15), and 23,225 small insertions/deletions  
2  
3 (indels) (Additional file 1: Table S16). The overall polymorphism density was 0.05–  
4  
5 0.12 SNPs and 0.004–0.007 indels per 10 kb of the genome sequence, which is much  
6  
7 lower than the diversity reported in orange [13]. Notably, the major variations existed  
8  
9 among the ‘FY’, ‘MQ’, and ‘SJM’ accessions, whereas variations within the  
10  
11 cultivated longan accessions, particularly the ‘LDB’ accessions, were relatively low  
12  
13 (Additional file 1: Tables S15 and S16).  
14  
15  
16  
17  
18  
19

20 To further investigate the population structure and relationships among the longan  
21  
22 accessions, we constructed a neighbor-joining tree (Fig. 2a) and carried out a principal  
23  
24 component analysis (PCA) (Fig. 2b). The neighbor-joining tree, constructed based on  
25  
26 all the identified SNPs, indicated that the 13 longan accessions clustered into two  
27  
28 subfamilies. The first subfamily consisted only of ‘FY’, which showed the highest  
29  
30 variations and clear separation from other cultivars. This result is quite different from  
31  
32 results reported previously [35, 36]. In previous studies using molecular markers,  
33  
34 ‘FY’, which originated from Quanzhou, China, was found to cluster together with  
35  
36 other Chinese longan accessions. In our study, which was conducted at an overall  
37  
38 genomic level, ‘FY’ was found to possess more genetic differences compared with the  
39  
40 other longan accessions tested. This result might be due to the special traits of ‘FY’,  
41  
42 such as witches' broom disease-resistant, middle-maturity, and canned processing  
43  
44 products. This result also supports the observed diversity of ‘FY’ at the overall  
45  
46 genomic level. The second subfamily neighbor-joining tree consisted of three clades  
47  
48 (Fig. 2a). The first clade included ‘JHLY’, ‘WLL’, ‘JYW’, and ‘SN1H’; the second  
49  
50  
51  
52  
53  
54  
55  
56  
57  
58  
59  
60  
61  
62  
63  
64  
65

1 contained 'MQ', 'SX', 'SJM', and 'SEY'; and the third consisted of 'DB', 'HHZ',  
2  
3 'LDB' and 'YTB'. Moreover, the PCA showed that the samples that originated from  
4  
5 China tended to cluster together ('HHZ', 'DB', 'JYW', 'LDB', 'WLL', 'SN1H',  
6  
7 'YTB', 'SEY', 'JHLY', and 'SX'). The PCA also showed the clear separation of  
8  
9 'FY', 'SJM', and 'MQ'. The 'SJM' and 'MQ' accessions, which originated from  
10  
11 Southeast Asia and Thailand, respectively, possessed apparent differences compared  
12  
13 with the Chinese longan accessions tested in this study. Together these results  
14  
15 indicated geographic patterns of genetic differentiation, which agree with findings  
16  
17 reported previously [34]. The relatively low levels of genetic variation among the  
18  
19 Chinese cultivars also suggested that they might have suffered a bottleneck during  
20  
21 domestication [7, 34]. These results suggested the relationship among the 13 selected  
22  
23 longan accessions was, at least partly, determined by their geographical distributions.  
24  
25

26  
27  
28  
29  
30  
31  
32  
33 An additional analysis of the population structure was conducted using the FRAPPE  
34  
35 program [37] with K (the number of populations) set from 2 to 7 (Fig. 2c). For K=7, a  
36  
37 new subgroup was detected among the 13 longan accessions. This subgroup had  
38  
39 characteristics, such as various maturity levels, high yielding, aborted-seeding,  
40  
41 disease-resistant, and multiple flowering. The cultivars 'SX' and 'YTB', which are  
42  
43 susceptible to disease, contained more variations in resistance genes, such as NBS-  
44  
45 LRR and LRR-RLK, than the disease resistant cultivars ('FY', 'SN1H', 'MQ', 'LDB',  
46  
47 and 'JYW') (Supplemental EXCEL Files 4 and 5). These results provided a measure  
48  
49 of the changes in genetic diversity and a theoretical estimate of the genetic  
50  
51 relationships among the selected longan cultivars.  
52  
53  
54  
55  
56  
57  
58  
59  
60  
61  
62  
63  
64  
65



1 **RNA sequencing revealed SNPs, indels, differentially expressed genes, and**  
2  
3 **alternative-splicing events in different tissues of ‘SJM’ longan**  
4

5  
6 To improve the gene annotation of the longan genome sequence and get more  
7  
8 information about longan traits, we constructed nine cDNA libraries corresponding to  
9  
10 nine different organs (root, stem, mature leaf, flower bud, flower, young fruit,  
11  
12 pericarp, pulp, and seed) from a representative ‘SJM’ cultivar. ‘SJM’, which  
13  
14 originated in Southeast Asia, blossoms and bears fruit throughout the year, with no  
15  
16 requirement of environmental control [38]. Here, a total of 490,502,822 clean reads  
17  
18 from nine RNA sequencing (RNA-seq) data sets were obtained after removing low-  
19  
20 quality reads and adaptor sequences, and about 53.55–79.40% of the clean reads  
21  
22 mapped to the longan draft genome (Additional file 1: Table S17). This percentage of  
23  
24 mapped reads is lower than the 90% previously reported in peach [39], suggesting that  
25  
26 the ‘SJM’ cultivar contained high variations compared with the sequenced ‘HHZ’  
27  
28 genome, probably because of their different origins. Moreover, the BUSCO analysis  
29  
30 [27] showed that 483 (87%) of BUSCO genes were “complete single-copy”, 352  
31  
32 (36%) were “complete duplicated”, 53 (5.5%) were “fragmented”, and 68 (7.1%)  
33  
34 were “missing” (Additional file 1: Table S18), indicating the high quality of our  
35  
36 assembled transcriptome.  
37  
38

39  
40 The transcribed regions/units were constructed independently for individual tissues.  
41  
42 We found that transcripts/genes ranged from 19,322 (pulp) to 23,118 (flower bud),  
43  
44 completely or partially (49.18–58.85%) overlapped with 39,282 annotated genes in  
45  
46 the longan genome. The numbers of expressed transcripts in each longan tissue were  
47  
48  
49  
50  
51  
52  
53  
54  
55  
56  
57  
58  
59  
60  
61  
62  
63  
64  
65

1 much lower than the numbers previously reported in *Brassica rapa* (32,335 genes  
2  
3 expressed in at least one tissue, equivalent to 78.8% of the 41,020 annotated genes)  
4  
5  
6 [40]. The lower numbers of transcripts detected in each tissue, may be due to the high  
7  
8 variations and genetic heterozygosity in the ‘SJM’ cultivar. The coverage of the  
9  
10 longan gene set by our transcripts indicated the broad representation of our unigenes,  
11  
12 and provided the opportunity to identify alternative splicing (AS) events. In addition  
13  
14 to the predicted genes, novel transcripts, ranged from 1,621 (stem) to 1,999 (young  
15  
16 fruit), were detected across all nine samples. Among the novel transcripts, 798  
17  
18 (flower) – 988 (young fruit) contained open reading frames, while 820 (stem) – 1,011  
19  
20 (young fruit) were identified as non-coding RNAs in the longan genome (Additional  
21  
22 file 1: Table S17). Most of these non-coding RNAs were longer than 200 nt and had  
23  
24 no ORFs encoding sequences longer than 300 amino acids, suggesting they may be  
25  
26 long intergenic non-coding RNAs [41] or *cis*-natural antisense transcripts [42], which  
27  
28 will need further analysis. The numbers of novel encoding and non-coding transcripts  
29  
30 in young fruit were the highest among the nine samples, suggesting the development  
31  
32 of young fruit required more complicate gene regulatory networks than the other  
33  
34 stages. To further optimize of the structure of the transcripts, we compared the  
35  
36 assembled transcripts and annotated genes from the reference longan genome and  
37  
38 extended the 5’ or 3’ ends of the transcripts according to the annotated gene  
39  
40 information. In total, the extending 5’ or 3’ end of annotated genes ranged from 8,126  
41  
42 (pulp) to 9,995 (flower bud) across nine tissues, and about almost half the number of  
43  
44 total genes extended by 5’ end in each sample. We identified a total of 1,255,816  
45  
46  
47  
48  
49  
50  
51  
52  
53  
54  
55  
56  
57  
58  
59  
60  
61  
62  
63  
64  
65

1 SNPs and 34,390 indels across the nine longan tissues, and found that the highest  
2  
3 number of SNPs and indels were detected in young fruit (161,897) and leaf (4,673),  
4  
5 respectively, suggesting the expressed transcripts may be more diverse in these two  
6  
7 tissues. Notably, the lowest frequencies of SNPs and indels were detected in pulp  
8  
9 (105,007 and 2,587 respectively). The SNPs and indels detected in the transcript  
10  
11 sequences will be a valuable resource from which to identify candidate genes, analyze  
12  
13 population structures and evolution, and accelerate plant breeding [39]. The  
14  
15 identification of novel genes extended annotated genes, SNPs, and indels from  
16  
17 different developmental stages, imply our gene set can serve as a valuable  
18  
19 complementary resource for longan genomics.  
20  
21  
22  
23  
24  
25  
26

27  
28 To identify significantly differentially expressed genes (DEGs), we used 12 pair-wise  
29  
30 comparisons among the nine samples as follows: root *VS* stem, root *VS* leaf, leaf *VS*  
31  
32 stem, flower bud *VS* flower, flower bud *VS* young fruit, flower *VS* young fruit, young  
33  
34 fruit *VS* pulp, young fruit *VS* seed, pericarp *VS* pulp, pericarp *VS* seed, and pulp *VS*  
35  
36 seed. Among the detected DEGs (Additional file 2: Fig. S5), an average of  
37  
38 3,922±2,391 were up-regulated and an average of 4,859±2,666 were down-regulated  
39  
40 in the 12 comparisons. The highest number of DEGs was detected in young fruit *VS*  
41  
42 seed (9,737), followed by root *VS* leaf (9,702) and flower *VS* young fruit (9,101), and  
43  
44 the lowest number of DEGs was detected in flower bud *VS* flower (3,722). The  
45  
46 numbers of organ-specific genes ranged from 87 in young fruit to 530 in root, and the  
47  
48 significantly differentially expressed transcription factors in each comparison ranged  
49  
50 from 272 (flower bud *VS* flower) to 732 (young fruit *VS* pulp). To evaluate the  
51  
52  
53  
54  
55  
56  
57  
58  
59  
60  
61  
62  
63  
64  
65

1 potential functions of the DEGs, we annotated them by assigning GO terms under the  
2  
3 three main categories, biological process, cellular component, and molecular function.  
4  
5  
6 DEGs in each pair were categorized into 43 (flower bud *VS* flower) - 47 (young fruit  
7  
8  
9 *VS* pulp). Details of the GO annotations are provided in Additional file 2: Fig. S6. The  
10  
11 dominant terms in all 12 comparisons were ‘Metabolic process’, ‘Cellular process’,  
12  
13 ‘Cell’, ‘Cell part’, ‘Catalytic activity’, and ‘Binding’, which is similar to results  
14  
15  
16 previously reported in the ‘SJM’ and ‘LDB’ cultivars [43]. To further understand the  
17  
18  
19 biological functions of the DEGs, we carried out a KEGG (Kyoto Encyclopedia of  
20  
21  
22 Genes and Genomes) pathway-based analysis. In nine of the 12 comparisons, the  
23  
24  
25 highest numbers of DEGs were involved in ‘metabolic pathway’, followed by the  
26  
27  
28 ‘biosynthesis of secondary metabolites’ and ‘plant–pathogen interaction’ pathways. In  
29  
30  
31 pericarp *VS* seed, root *VS* leaf, and pericarp *VS* pulp, ‘biosynthesis of secondary  
32  
33  
34 metabolites’, ‘pyrimidine metabolism’, and ‘stilbenoid, diarylheptanoid and gingerol  
35  
36  
37 biosynthesis’ were the most represented pathways, respectively (Additional file 2:  
38  
39 Fig. S7). These results are fully consistent with the view that *D. longan* contains high  
40  
41  
42 levels of polyphenolic compounds, and a large number of pathogen resistance genes  
43  
44  
45 [44, 45].

46  
47 To determine the types of AS events represented in our assembled transcripts data set,  
48  
49  
50 we used the TopHat software [46]. First, the nine longan tissues were analyzed at the  
51  
52  
53 exon level, which can provide important information about the types of gene isoforms  
54  
55  
56 that are expressed and variable [47]. Expressed exons were detected in the range of  
57  
58  
59 96,105 (pulp) to 111,476 (flower bud) across the nine tissues (Additional file 1: Table  
60  
61  
62  
63  
64  
65

1 S17). A total of 298,914 AS events were detected across all the tissues, representing  
2  
3 the four known types of AS, namely intron retention, exon skipping, alternative 5'  
4  
5 splice site donor, and alternative 3' splice site acceptor. Alternative transcripts have  
6  
7 been shown to be tissue- or condition-specific [47, 48]. We also found that the largest  
8  
9 numbers of AS events were detected in leaf (37,216), followed by young fruit  
10  
11 (35,998), and pericarp (35,384), and the smallest numbers were found in pulp  
12  
13 (28,058), corresponding to the least expressed exons. The predominant and rare types  
14  
15 of AS events in all nine tissues were intron retention and exon skipping, respectively.  
16  
17 This result is consistent with prior findings in rice [49], Arabidopsis [50], grape [48,  
18  
19 51], and *B. rapa* [40], but contradicts a previous finding that exon-skipping was  
20  
21 predominant in peach [39] and metazoans [52], indicating the complexity of the AS  
22  
23 landscape in plants and the important consequences this may have on plant/crop  
24  
25 phenotypes.  
26  
27  
28  
29  
30  
31  
32  
33  
34

### 35 **Biosynthesis of polyphenols and MYB transcription factors in longan**

36  
37 Polyphenols, potential antioxidative compounds, are the major category of secondary  
38  
39 metabolites in longan leaf, flower, fruit, and seed [4]. Phenolic compounds are derived  
40  
41 primarily through the shikimic acid, phenylpropanoid, and flavonoid pathways. Our  
42  
43 transcriptome data showed that the significant DEGs in the nine longan tissues were  
44  
45 involved mainly in 'biosynthesis of secondary metabolites'. To further assess changes  
46  
47 between the primary and secondary metabolism of polyphenols during the longan  
48  
49 vegetative and reproductive growth stages, the copy numbers of 26 selected structural  
50  
51 genes within the shikimate acid, phenylpropanoid, and flavonoid biosynthesis  
52  
53  
54  
55  
56  
57  
58  
59  
60  
61  
62  
63  
64  
65

1 pathways were compared with those in corresponding pathways of Arabidopsis,  
2  
3 orange, peach, grape, poplar, and eucalyptus ([Fig. 3a](#), Supplemental EXCEL File 6).  
4

5  
6 Comparison analysis showed that the 26 structural genes showed up and down  
7  
8 variations in copy numbers among the seven plants tested (Supplemental EXCEL File  
9  
10 6). The significant expanded gene families in longan, orange, peach, poplar, and  
11  
12 eucalyptus were *DHS*, *SDH*, *F3'H*, *ANR*, and *UFGT*, when compared with the  
13  
14 corresponding families in grape, which is considered to be the oldest among the seven  
15  
16 selected plants in evolutionary history [53]. *SDH*, catalyzes the NADPH-dependent  
17  
18 reduction of 3-dehydroshikimate to shikimate in the fourth step of the shikimate  
19  
20 pathway, which is the metabolic route required for the biosynthesis of the aromatic  
21  
22 amino acids. *SDH* had six copy numbers in longan, which is the same as in *Populus*,  
23  
24 but much higher than in *Arabidopsis* (1 copy), peach and grape (2 copies each), and  
25  
26 orange and eucalyptus (3 copies each). *F3'H* is involved in flavonoid biosynthesis and  
27  
28 is important for flower color and fruit skin. We found 65 copies of *F3'H* in the  
29  
30 eucalyptus genome, 35 in longan, 28 in peach, 25 in orange, 26 in *Populus*, and only  
31  
32 12 in grape and 10 in *Arabidopsis*, suggesting that the *F3'H* family was significantly  
33  
34 expanded in woody plants and a little contracted in herbs. These findings may provide  
35  
36 important clues for the mechanism of flavonoid biosynthesis in plants. The gene  
37  
38 encoding *ANR*, which is involved in the biosynthesis of proanthocyanidins (also  
39  
40 called condensed tannins), had higher copy numbers (6) in longan than in *Arabidopsis*  
41  
42 (2), orange (1), peach (1), grape (4), and *Populus* (5), implying that the expanded *ANR*  
43  
44 numbers may play a role in proanthocyanidin biosynthesis. Significantly smaller  
45  
46  
47  
48  
49  
50  
51  
52  
53  
54  
55  
56  
57  
58  
59  
60  
61  
62  
63  
64  
65

1 numbers of the structural genes *PAL*, *CHS*, and *F3'5'H* were detected in longan (6, 14,  
2  
3 3), Arabidopsis (4, 1, 1), orange (4, 15, 4), peach (3, 7, 4), eucalyptus (9, 16, 8), and  
4  
5  
6 Populus (5, 12, 2), compared with the higher numbers detected in grape (13, 34, 12).  
7  
8  
9 PAL and CHS are involved in the key regulatory step in the branch pathway of  
10  
11 phenylpropanoid biosynthesis specific for synthesis of ubiquitous flavonoid pigments  
12  
13 [54], and F3'5'H is important for determining flower color [55], which may  
14  
15 suggesting that the PAL, CHS, and F3'5'H encoding genes that were discarded in the  
16  
17 evolution history of longan, Arabidopsis, orange, peach, eucalyptus, and Populus  
18  
19 compared with grape were functionally redundant. Besides the expanded and  
20  
21 contracted numbers of structural genes, other structural genes, namely *DHS*, *DHQS*,  
22  
23 *SK*, *EPSP*, *CS*, *CM*, *ADT*, *C4H*, *4CL*, *CHI*, *F3H*, *DFR*, and *ANS*, showed little  
24  
25 variations in copy numbers among longan, Arabidopsis, orange, peach, grape, poplar,  
26  
27 and eucalyptus, which indicated their evolutionary conservation in different plant  
28  
29 species. Overall, the expended, contracted, and conserved copy numbers of the 26  
30  
31 selected structural genes among the seven selected plants defined the different  
32  
33 characteristics of polyphenol biosynthesis in the different species.  
34  
35

36  
37 To further understand the functions of the 26 structural genes, we measured their  
38  
39 expression levels between primary and secondary metabolism during longan  
40  
41 vegetative and reproductive growth ([Fig. 3b](#), Supplemental EXCEL File 7). The PCA  
42  
43 showed that all the genes related to the biosynthesis of polyphenols were similarly  
44  
45 expressed in leaf, pulp, and pericarp, but their expression levels differed among root,  
46  
47 stem, flower bud, flower, young fruit, and seed ([Fig. 3b](#)), suggesting these genes may  
48  
49  
50  
51  
52  
53  
54  
55  
56  
57  
58  
59  
60  
61  
62  
63  
64  
65

1 have tissue-specific roles in longan. Thirteen of the 26 structural genes were found to  
2  
3 be expressed in specific tissues, such as root, flower, flower bud, and/or seed  
4  
5 (Supplemental EXCEL File 7). For example, two members of the *SDH* family,  
6  
7 Cs9g05070.1-D1 and Cs9g05070.1-D5, showed high expression levels during the  
8  
9 vegetative and reproductive stages, especially in pulp and pericarp, while the other  
10  
11 members of the family were barely detectable, suggesting that Cs9g05070.1-D1 and  
12  
13 Cs9g05070.1-D5 may play major roles in the shikimate acid pathway. The six  
14  
15 members of the *PAL* family all exhibited low or undetectable expression levels in  
16  
17 pulp, two had the highest expression levels in stem, and the other four were strongly  
18  
19 expressed in stem, root, leaf, flower, and pericarp. The tissue-specific expression  
20  
21 pattern of *PAL* further confirmed that *PAL* was related to lignin, the structural  
22  
23 component of the cell wall in longan [56]. Five of the 14 members of the *CHS* family  
24  
25 were barely detectable among the nine samples; among the other members, the  
26  
27 highest expression levels were observed for four in seed, three in flower bud, and two  
28  
29 in root, suggesting that *CHS* played important roles in the synthesis of flavonoid  
30  
31 pigments in flower bud and seed. The 35 members of the *F3'H* family (Fig. 3c),  
32  
33 exhibited different temporal and spatial expression levels (Fig. 3d). Among them, the  
34  
35 highest expression levels were observed for one of the members in root, two in stem,  
36  
37 five in leaf, eleven in flower bud, three in flower, six in young fruit, three in pericarp,  
38  
39 and three in seed; while 11 *F3'H* family members were barely detectable in pericarp,  
40  
41 pulp, and seed. For the three members of the *F3'5'H* family, one was detected only in  
42  
43 root and one only in flower bud, implying *F3'H* and *F3'5'H* both played major roles in  
44  
45  
46  
47  
48  
49  
50  
51  
52  
53  
54  
55  
56  
57  
58  
59  
60  
61  
62  
63  
64  
65



1 determining longan flower colors. Proanthocyanidin synthesis involves both *LAR* and  
2  
3 *ANR* (Fig. 3c). The six *ANR* family members and two of the four *LAR* members were  
4  
5 barely detectable in pulp, and all the *ANR* and *LAR* genes were highly expressed in  
6  
7 pericarp, and relatively less expressed in seed (Fig. 3d). Previous studies of 12  
8  
9 varieties of Chinese longan fruit have shown that total polyphenols, tannins, and  
10  
11 proanthocyanidins were most abundant in pericarp, followed by seed and pulp [57].  
12  
13 The high expression levels of *ANR* and *LAR* in pericarp and seed, and their lowest  
14  
15 expression levels in pulp indicated they may determine the tannin composition of  
16  
17 longan fruit, further indicating why whole longan fruit is dried for use in sweet  
18  
19 desserts and soups for human health [58].  
20  
21  
22  
23  
24  
25  
26

27  
28 The *MYB* family of TFs is involved in the regulation of flavonoid biosynthesis [59].  
29  
30 To further investigate the biosynthesis of polyphenols in longan, we compared the  
31  
32 numbers of *MYB*-encoding genes in longan with their numbers in *Arabidopsis*,  
33  
34 orange, peach, and grape. We also investigated their expression levels in longan using  
35  
36 the genome and transcriptome data. We detected 94 *R2R3-MYB* genes in longan,  
37  
38 which was more than in orange (74) and peach (88), but less than in grape (116), and  
39  
40 *Arabidopsis* (141) (Fig. 4a). A neighbor-joining tree of the *MYB* gene family was  
41  
42 constructed (Fig. 4b). The expression profiles of the *MYB* gene family in each tissue  
43  
44 were clustered by PCA. The plots showed that the expression profiles in three of the  
45  
46 tissues (stem, pericarp, and seed) formed one cluster, while the expression profiles of  
47  
48 the other tissues were independently separated, implying that each had a distinct *MYB*  
49  
50 expression profile (Fig. 4c). All members of the *MYB* gene family were expressed at  
51  
52  
53  
54  
55  
56  
57  
58  
59  
60  
61  
62  
63  
64  
65

1 varying levels among the nine vegetative growth and reproductive growth tissues,  
2  
3 with some preferentially expressed in specific tissues (Fig. 4d, Supplemental EXCEL  
4  
5 File 8). In Arabidopsis, specific *R2R3-MYB* family members, namely *MYB3* -5, -7, -  
6  
7 11, -12, -32, -75, -90, -111, -113, -114, and -123, are known to be involved in  
8  
9 regulating the flavonoid pathway [59]. In longan, only four *R2R3-MYB* genes, which  
10  
11 are homologs of *AtMYB4*, -12, and -123, were found. In Arabidopsis, *AtMYB4* down-  
12  
13 regulated *C4H* and controlled sinapate ester biosynthesis in a UV-dependent  
14  
15 manner; *AtMYB12* up-regulated *CHS*, *CHI*, *F3H*, and *F3'H*, and controlled flavonol  
16  
17 biosynthesis in all the tissues tested; and *AtMYB123* up-regulated *DNS* and controlled  
18  
19 the biosynthesis of proanthocyanidins in the seed coat [59]. In longan, three of the  
20  
21 four homologous *R2R3-MYB* genes reached peaks in root, but were undetected or  
22  
23 lowly expressed in pericarp, pulp, and seed (Fig. 4d). The tissue-specific expression  
24  
25 of these genes indicated they may be required for flavonoid biosynthesis.  
26  
27  
28  
29  
30  
31  
32  
33  
34  
35

### 36 **Identification and classification of genes encoding NBS-LRR and LRR-RLK**

37  
38  
39 Transcriptome data analysis showed that longan contained a large number of  
40  
41 significantly differentially expressed plant pathogen resistance genes. To further  
42  
43 investigate the molecular basis for longan pathogen susceptibility, we searched for  
44  
45 two classes of resistance genes in the longan genome, those encoding nucleotide  
46  
47 binding site-leucine rich repeat (NBS-LRR) proteins and those encoding leucine rich  
48  
49 repeat-receptor-like kinases (LRR-RLK). We identified 594 NBS-LRR and 338 LRR-  
50  
51 RLK encoding genes, which accounted for approximately 1.51% and 0.86% of the  
52  
53 annotated protein-coding genes in longan, respectively. These numbers of NBS-LRR  
54  
55  
56  
57  
58  
59  
60  
61  
62  
63  
64  
65

1 and LRR-RLK coding genes in the longan genome were more than those in orange  
2  
3 (509, 325) [13], grape (341, 234) [10], kiwifruit (110, 259) [16], peach (425, 268)  
4  
5 [14], mei (411, 253) [12], and papaya (60, 134) [9], but nearly half that in apple  
6  
7 (1035, 477) [11] (Additional file 1: Table S19). *NBS* and *LRR* existed before the  
8  
9 divergence of prokaryotes and eukaryotes, but their fusion has been detected only in  
10  
11 land plant lineages [60], which are assumed to have originated from a common  
12  
13 ancestor. A previous study showed that grape was the oldest among the fruits tested  
14  
15 [53]. In this study, the numbers of *NBS-LRR* and *LRR-RLK* genes were either more or  
16  
17 less in longan, orange, kiwifruit, peach, papaya, mei, and apple compared with grape.  
18  
19 Detail analysis showed that the total number of genes encoding NBS and LRR was  
20  
21 not associated with genome expansion or the total number of protein-coding genes in  
22  
23 the selected genomes, which is similar to what was found in grass species [60].  
24  
25 Moreover, the NBS- and LRR-encoding genes were significantly more in apple than  
26  
27 in the other selected fruits, possibly as a result of a whole-genome wide duplication  
28  
29 event in apple [53]. The uneven distribution of NBS-, and LRR-encoding genes on  
30  
31 chromosomes was reported previously in Arabidopsis, rice, grapevine, and poplar  
32  
33 [61]. These results suggest that changes in the numbers of genes encoding NBS-LRR  
34  
35 and LRR-RLK in different species may alter the resistance of these species to  
36  
37 different diseases.  
38  
39  
40  
41  
42  
43  
44  
45  
46  
47  
48  
49  
50  
51

52 The 594 encoded NBS-LRRs in longan were classified into six subgroups based on  
53  
54 their protein domains: NBS-LRR (258, 43.43%), coiled-coil-NBS-LRR (150,  
55  
56 25.25%), NBS (122, 20.54%), coiled-coil-NBS (37, 6.23 %), Toll interleukin receptor  
57  
58  
59  
60  
61  
62  
63  
64  
65

1 (TIR)-NBS-LRR (23, 3.87%), and TIR-NBS (4, 0.67%) (Additional file 1: Table  
2  
3 S19). Previous studies have shown that the deduced NBS-LRR proteins can be  
4  
5 divided into two subfamilies, TIR and non-TIR proteins based on their N-terminal  
6  
7 features [62]. The TIR family of *NBS-LRR* genes probably originated earlier than the  
8  
9 non-TIR family [60]. Here, the number of genes encoding the TIR proteins (TIR-  
10  
11 NBS-LRR and TIR-NBS) varied from one (kiwifruit) to 288 (apple), and the number  
12  
13 of genes encoding the non-TIR proteins was 567 in longan, 415 in orange, 320 in  
14  
15 grape, 109 in kiwifruit, 282 in peach, 53 in papaya, and 753 in apple. The ratio of TIR  
16  
17 to non-TIR genes was found to differ markedly in different species [62], suggesting  
18  
19 ancient origins and subsequent divergence between the two NBS gene types. The  
20  
21 distribution of resistance genes in the longan genome and the encoded domains are  
22  
23 similar to those of the resistance proteins in other sequenced genomes, as shown in  
24  
25 Additional file 1: Table S19. In addition, we noted that allelic variations due to the  
26  
27 presence of SNPs in NBS-encoding genes were associated with the phenotypic  
28  
29 divergence between resistant ('FY', 'SN1H', 'MQ', 'LDB', and 'JYW') and susceptible  
30  
31 ('SX', and 'YTB') longan accessions. Such detailed knowledge of the longan genome  
32  
33 will help to accelerate the development of genetic strategies to counter fruit loss  
34  
35 caused by diverse pathogens [30].  
36  
37  
38  
39  
40  
41  
42  
43  
44  
45  
46  
47  
48  
49  
50

## 51 **Conclusions**

52 Here, a draft genome of *D. longan* is presented for the first time. The assembled  
53  
54 genome sequence is 471.88 Mb with 273.44-fold coverage obtained by paired-end  
55  
56 sequencing. Whole-genome resequencing and analysis of 13 representative cultivated  
57  
58  
59  
60  
61  
62  
63  
64  
65

1 *D. longan* accessions revealed the extent of genetic diversity and contributed to trait  
2  
3 discovery. Annotation of the protein-coding genes, comparative genomic analysis,  
4  
5 and transcriptome analyses provided insights into longan-specific traits, particularly  
6  
7 those involved in the biosynthesis of secondary metabolites and pathogen resistance.  
8  
9

## 10 11 12 **Methods**

### 13 14 15 **Germplasm genetic resources**

16  
17 An 80-year old *D. longan* ‘HHZ’ cultivar from the Fujian Agriculture and Forestry  
18  
19 University, China, was used for genomic DNA isolation and sequencing. RNA samples from  
20  
21 root, leaf, floral bud, flower, young fruit, mature fruit, [pericarp](#), pulp, and seed tissues of the  
22  
23 *D. longan* ‘SJM’ cultivar from the experimental fields of Fujian Academy of Agricultural  
24  
25 Science in Putian, Fujian Province, were collected for transcriptome sequencing. Fourteen *D.*  
26  
27 *longan* cultivars, ‘HHZ’, ‘SJM’, ‘SN1H’, ‘JYW’, ‘SX’, ‘WLL’, ‘MQ’, ‘YTB’, ‘SEY’, ‘LDB’,  
28  
29 ‘JHLY’, ‘FY’, ‘DB’, and ‘SFB’, that originated or are widely grown in Asia and other regions  
30  
31 of the world, were collected for resequencing.  
32  
33  
34  
35  
36  
37  
38  
39

### 40 41 **DNA extraction, library construction, whole-genome shotgun sequencing and assembly**

42  
43 Whole-genome shotgun sequencing was performed using the Illumina HiSeq 2000 system.  
44  
45 Genomic DNA was extracted from fresh mature leaves of the *D. longan* ‘HHZ’ cultivar using  
46  
47 the modified SDS method. DNA sequencing libraries were constructed according to the  
48  
49 standard Illumina library preparation protocols. A total of 12 paired-end sequencing libraries,  
50  
51 spanning 170, 250, 500, 800, 2,000, 5,000, 10,000, 20,000, and 40,000 bp, were constructed  
52  
53 and sequenced on an Illumina HiSeq 2000 system. After stringent filtering and correction  
54  
55 steps using K-mer frequency-based methods [21], a total of 121.68 Gb of data were obtained,  
56  
57  
58  
59  
60  
61  
62  
63  
64  
65

1 and then assembled using SOAPdenovo and SSPACE software [63]. To check the  
2  
3 completeness of the assembly, a longan transcriptome assembly comprising 68,925 unigenes  
4  
5 [SRA050205] was mapped to the genome assembly using BLAT32 with various sequence  
6  
7 homology and coverage parameters. The BUSCO pipeline [27] was also used to check the  
8  
9 genome completeness.  
10  
11  
12

### 13 **Repetitive elements identification**

14 Tandem repeats and interspersed repeats are two main types of repeats found in genomes.  
15  
16 Tandem repeats were identified using LTR\_FINDER [64] with the default parameters.  
17  
18 Interspersed repeats were identified by Repeat Masker (<http://www.repeatmasker.org/>) and  
19  
20 RepeatProteinMask using the Repbase library [65] and the *de novo* transposable element  
21  
22 library. Identified repeats were then classified into different known classes, as previously  
23  
24 described [33].  
25  
26  
27  
28  
29  
30  
31  
32

### 33 **Gene prediction and annotation**

34 For gene prediction, the scaffolds were first repeat-masked [65]. Then, three *de novo*  
35  
36 homology-based and RNA-seq unigenes-based prediction methods, Augustus [66],  
37  
38 GENSCAN [67], and GlimmerHMM [68], were used with parameters trained on *Arabidopsis*  
39  
40 *thaliana* and *Carica papaya*. The *de novo* predictions were then merged into a unigene set.  
41  
42 For the homology search, translated protein sequences from three sequenced plant genomes  
43  
44 (*Glycine max*, *Populus trichocarpa*, and *Vitis vinifera*) were mapped to the longan genome  
45  
46 assembly using TBLASTN (E-value cutoff  $1 \times 10^{-5}$ ). To extract accurate exon–intron  
47  
48 information, the homologous genome sequences were aligned against the matching proteins  
49  
50 using GeneWise [69]. Subsequently, the Illumina RNA-seq unigenes sequences [26] were  
51  
52  
53  
54  
55  
56  
57  
58  
59  
60  
61  
62  
63  
64  
65

1 aligned to the longan genome assembly using BLAT [70] to detect spliced alignments.  
2

3 Finally, to generate the consensus gene set, the results obtained using the three methods  
4  
5 described above were integrated using the GLEAN program [71]. The final gene set contained  
6  
7  
8 39,282 genes. TFs were identified and classified using the TAK program [72]. Non-coding  
9  
10  
11 RNAs were predicted and classified, as previously described [73]. Functions of the predicted  
12  
13  
14 protein genes were obtained by BLAST searches (E-value cutoff  $1 \times 10^{-5}$ ) against the  
15  
16  
17 InterproScan [74], GO [75], KEGG [76], SwissProt [77], and TrEMBL databases.  
18  
19

### 20 **Gene families and phylogenetic analysis**

21  
22 To identify gene families, the translated proteins sequences from *T. cacao*, *C. sinensis*, *A.*  
23  
24  
25 *thaliana*, *C. papaya*, *Populus trichocarpa*, *Glycine max*, *V. vinifera*, *M. acuminata*, *P.*  
26  
27  
28 *persica*, *A.chinensis*, and *M.domestica* genomes were scanned using BLASTP (E-value cutoff  
29  
30  
31  $1e-5$ ), and gene family clusters among the different plant species were identified by  
32  
33  
34 OrthoMCL [78]. Single-copy families that were represented in all the selected species were  
35  
36  
37 alignment using MUSCLE [79]. 4DTv in the 12 species, including longan, were used to  
38  
39  
40 construct a phylogenetic tree by MRBAYES [80]. The divergence time was estimated using  
41  
42  
43 the MultiDivtime software [79]. Colinearity between *D. longan* and *P. trichocarpa* was  
44  
45  
46 computed by SyMAP v3.4 [81]. Subsequently, TF families were identified using the  
47  
48  
49 IPR2genomes tool in GreenphylDB v2.0 [82] based on InterPro domains, and gene family  
50  
51  
52 expansion and contraction within phylogenetically-related organisms was detected by CAFÉ,  
53  
54  
55 a tool for computational analysis of gene family evolution [31].  
56

### 57 **Resequencing, SNPs, indels, and sequence variations analysis**

58 Paired-end Illumina libraries for 13 *D. longan* cultivars were prepared following the  
59  
60  
61  
62  
63  
64  
65

1 manufacturer's instructions and sequenced on an Illumina HiSeq 2000 system. After stringent  
2  
3 filtering and correction steps, the resulting sequence data were uniquely aligned to the  
4  
5 reference longan genome. SNPs, indels, and sequence variations were identified using  
6  
7 SOApsnp (<http://soap.genomics.org.cn/soapsnp.html>), SOAPindel [83], and SOAPsv [84].  
8  
9

10  
11 We used all and high quality SNPs to infer the phylogeography and population structure for  
12  
13 *D. longan*. A phylogenetic tree was subsequently generated using the neighbor-joining  
14  
15 method implemented in TreeBeST. The bootstrap was set as 1000 replicates.  
16  
17

18  
19 Population structure was examined primarily via PCA using our own program and model-  
20  
21 based clustering algorithms implemented in FRAPPE v1.1 (<http://smstaging.stanford.edu/tanglab/software/frappe.html>), We increased the pre-defined genetic clusters from K2 to  
22  
23 K7 and ran the analysis with 10,000 maximum iterations.  
24  
25  
26  
27  
28  
29

### 30 **Transcriptome sequencing**

31  
32 Transcriptome sequencing was performed on the Illumina HiSeq 2000 system. Total RNAs  
33  
34 from the samples described above were isolated using a TRIzol Reagent kit (Invitrogen,  
35  
36 Carlsbad, CA). cDNA libraries were constructed and sequenced using the Illumina protocols.  
37  
38  
39 All the raw reads were first processed to remove the adaptor sequences, low quality reads, and  
40  
41 possible contaminations from chloroplast, mitochondrion, and ribosomal DNA. The clean  
42  
43 reads were then aligned to the longan genome sequence using TopHat [46] to identify exons  
44  
45 and splice junctions *ab initio*. The expression levels of matched genes in each cDNA library  
46  
47 were derived and normalized to fragments per kilobase of exon per million fragments  
48  
49 mapped. Cluster 3.0 [85] was used to analyze hierarchical clustering of genes. DEGs among  
50  
51 different samples were identified using the EBSeq packages [86]. Subsequently, GATK  
52  
53  
54  
55  
56  
57  
58  
59  
60  
61  
62



1 (http://www.broadinstitute.org/gatk/) with default parameters was used to call SNPs based on  
2  
3 the transcript sequence data.  
4

### 5 6 **Identification of genes associated with secondary metabolites**

7  
8 We downloaded all the proteins from Arabidopsis, orange, peach, and grape, and identified  
9 the genes encoding them using the following methods. First, we collected previously  
10 published related genome sequences as the query sequences. We then used TBLASTN (NCBI  
11 Blast v2.2.23) [70] to align the query sequences against each genome sequence (E-value  
12 cutoff  $<1e-10$ ). Because many query sequences aligned to the same genomic region, we  
13 extracted only the high quality alignments (Query\_align\_ratio  $\geq 70\%$  and Identity  $\geq 40\%$ ).  
14 Functional intact genes were confirmed as follows. First, we collected the blast-hits as  
15 described above. Then, we extended each of the blast-hits sequences in both the 3' and 5'  
16 directions along the genome sequences and predicted the gene structure by Genewise (v2.2.0)  
17 [69]. Using this approach, we obtained all the pathway genes in longan and the other fruit  
18 plants.  
19  
20  
21  
22  
23  
24  
25  
26  
27  
28  
29  
30  
31  
32  
33  
34  
35  
36  
37  
38

### 39 **Identification of *MYB* genes**

40 We download the annotated *MYB* genes from Arabidopsis, orange, peach, and grape,  
41 and applied identification methods that were similar to those described in the  
42 'Identification of genes associated with secondary metabolites' section.  
43  
44  
45  
46  
47  
48  
49

### 50 **Disease resistance genes analysis**

51 Identification of longan resistance-related genes was based on the most conserved  
52 motif structures of plant resistance proteins. Details of the methods used were as  
53 described in [30].  
54  
55  
56  
57  
58  
59  
60  
61  
62

## Availability of supporting data and materials

The draft genome sequencing project of *D. longan* is registered at NCBI under BioProject [PRJNA305337]. The NCBI SRA database with accession numbers [SRA315202], and the sample Accession were [SRS1272137], [SRS1272138], [SRS1272139], and [SRS1272140]. The *D. longan* ‘SJM’ transcriptome data is deposited at NCBI under BioProject [PRJNA326792]. Supporting genome assemblies, annotations, supplemental data and custom scripts are hosted in the *GigaScience* GigaDB repository [87].

## Declarations

### List of abbreviations

**ADT:** arogenate dehydratase/ prephenate dehydratase; **ANS:** anthocyanidin synthase;  
**CS:** chorismate synthase; **CM:** chorismate mutase; **C4H:** cinnamate 4-hydroxylase;  
**CHS:** chalcone synthase; **CHI:** chalcone-flavanone isomerase; **DHS:** 3-deoxy-D-arabino- heptulosonate 7-phosphate synthase; **DHQS:** 3-dehydroquininate synthase;  
**DFR:** dihydroflavonol 4-reductase; **EPSPS:** 3-phosphoshikimate 1-carboxyvinyltransferase/ 5-enolpyruvylshikimate- 3- phosphate/ EPSP synthase;  
**F3H:** flavanone 3-hydroxylase; **F3’H:** flavonoid 3’-hydroxylase; **F3’5’H:** flavonoid 3’,5’-hydroxylase; **indels:** insertions/ deletions; **LDOX:** leucoanthocyanidin dioxygenase; **LAR:** leucoanthocyanidin reductase; **Mb:** million base; **PCA:** principal component analysis; **PAL:** phenylalanine ammonia lyase; **SNPs:** single nucleotide polymorphisms; **SDH:** bifunctional 3- dehydroquininate dehydratase/ shikimate dehydrogenase; **SK:** shikimate kinase; **4CL:** 4-coumaroyl- coenzyme A ligase.

1 **Consent for publication**

2  
3 Not applicable

4  
5  
6 **Competing interests**

7  
8  
9 The authors declare no competing financial interests.

10  
11 **Funding**

12  
13  
14 This work was funded by the Research Funds for the National Natural Science Foundation of  
15  
16 China (31672127, 31572088, 31272149, 31201614, and 31078717), the Science and  
17  
18 Technology Plan Major Projects of Fujian Province (2015NZ0002-1), the Natural Science  
19  
20 Funds for Distinguished Young Scholar in Fujian Province (2015J06004), the program for  
21  
22 New Century Excellent Talents in Fujian Province University (20151104), the Doctoral  
23  
24 Program of Higher Education of the Chinese Ministry of Education (20093515110005 and  
25  
26 20123515120008), the Education Department of Fujian Province Science and Technology  
27  
28 Project (JA14099), the Program for High-level University Construction of the Fujian  
29  
30 Agriculture and Forestry University (612014028), and the Natural Science Funds for  
31  
32 Distinguished Young Scholar of the Fujian Agriculture and Forestry University (xjq201405).

33  
34  
35 **Authors' contributions**

36  
37  
38  
39 ZXL, YLL, and YY designed the research; YLL, ZXL, RLL, YKC, CZC, QLT, WHL,  
40  
41 LXL, DMZ, MKT, ZHZ, CSZ, and SCL collected the samples and prepared the DNA  
42  
43 and RNA. LLY, ZYW, QFL, and YH did the sequencing, processed the raw data, and  
44  
45 assembled the sequences. XDF, ZYW, CGZ, JW, and HMY coordinated the project.  
46  
47  
48 YLL, ZXL, JMM, LLY, ZYW, QFL, and YH analyzed the data. YLL, and JMM wrote  
49  
50 the paper. ZXL, YY, and RKV revised the paper.  
51  
52  
53  
54  
55  
56  
57  
58  
59  
60  
61  
62  
63  
64  
65

## Acknowledgments

We thank the following colleagues from the experimental fields of the Fujian Academy of Agricultural Science in Putian for samples.

## Additional files

Additional file 1: Tables S1 to S19

Additional file 2: Figures S1 to S7

Supplementary EXCEL File 1: Identification of transcription factors in the *Dimocarpus longan* genome

Supplementary EXCEL File 2: Significantly expanded gene families detected in the *Dimocarpus longan* genome (Viterbi  $p \leq 0.05$ )

Supplementary EXCEL File 3: Significantly contracted gene families detected in the *Dimocarpus longan* genome (Viterbi  $p \leq 0.05$ )

Supplementary EXCEL File 4: SNP analysis of FY, SN1H, MQ, LDB, and JYW cultivars

Supplementary EXCEL File 5: SNP analysis of SX and YTB cultivars

Supplementary EXCEL File 6: Statistics of copy numbers of genes involved in the biosynthesis of polyphenols in different plants

Supplementary EXCEL File 7: Expression levels of genes involved in the biosynthesis of polyphenols in *Dimocarpus longan*

Supplementary EXCEL File 8: MYB genes expressed in nine different tissues of *Dimocarpus longan*

## References

1. Lai Z, Chen C, Zeng L, Chen Z. Somatic embryogenesis in longan [*Dimocarpus longan* Lour.]. In: *Somatic Embryogenesis in Woody Plants*. Edited by Jain SM, Gupta P, Newton R, vol. 67: Springer Netherlands; 2000. p.415-431.
2. Luo J, Zhou C-f, Wan Z. Analysis on the development status of lychee industry in Guangdong province in 2010. Guangdong Agricultural

Sciences. 2011; 4:16-8.

3. Mei ZQ, Fu SY, Yu HQ, Yang LQ, Duan CG, Liu XY, Gong S, Fu JJ. Genetic characterization and authentication of *Dimocarpus longan* Lour. using an improved RAPD technique. *Genet Mol Res.* 2014; 13(1):1447-55.
4. Jiang G, Jiang Y, Yang B, Yu C, Tsao R, Zhang H, Chen F. Structural characteristics and antioxidant activities of oligosaccharides from longan fruit pericarp. *Journal of agricultural and food chemistry.* 2009; 57(19):9293-98.
5. Chung YC, Lin CC, Chou CC, Hsu CP. The effect of longan seed polyphenols on colorectal carcinoma cells. *European journal of clinical investigation.* 2010; 40(8):713-21.
6. Prasad KN, Yang B, Shi J, Yu C, Zhao M, Xue S, Jiang Y. Enhanced antioxidant and antityrosinase activities of longan fruit pericarp by ultra-high-pressure-assisted extraction. *Journal of pharmaceutical and biomedical analysis.* 2010; 51(2):471-77.
7. Lin T, Lin Y, Ishiki K. Genetic diversity of *Dimocarpus longan* in China revealed by AFLP markers and partial *rbcL* gene sequences. *Scientia Horticulturae.* 2005; 103(4):489-98.
8. Yonemoto Y, Chowdhury AK, Kato H, Macha MM. Cultivars identification and their genetic relationships in *Dimocarpus longan* subspecies based on RAPD markers. *Scientia Horticulturae.* 2006; 109(2):147-52.
9. Ming R, Hou S, Feng Y, Yu Q, Dionne-Laporte A, Saw JH, Senin P, Wang W, Ly BV, Lewis KL *et al.* The draft genome of the transgenic tropical fruit tree papaya (*Carica papaya* Linnaeus). *Nature.* 2008; 452(7190):991-96.
10. Jaillon O, Aury JM, Noel B, Policriti A, Clepet C, Casagrande A, Choisne N, Aubourg S, Vitulo N, Jubin C *et al.* The grapevine genome sequence suggests ancestral hexaploidization in major angiosperm phyla. *Nature.* 2007; 449(7161):463-67.
11. Velasco R, Zharkikh A, Affourtit J, Dhingra A, Cestaro A, Kalyanaraman A, Fontana P, Bhatnagar SK, Troggio M, Pruss D *et al.* The genome of the domesticated apple (*Malus x domestica* Borkh.). *Nature genetics.* 2010; 42(10):833-39.
12. Zhang Q, Chen W, Sun L, Zhao F, Huang B, Yang W, Tao Y, Wang J, Yuan Z, Fan G *et al.* The genome of *Prunus mume*. *Nature communications.* 2012; 3:1318.
13. Xu Q, Chen LL, Ruan X, Chen D, Zhu A, Chen C, Bertrand D, Jiao WB, Hao BH, Lyon MP *et al.* The draft genome of sweet orange (*Citrus sinensis*). *Nature genetics.* 2013; 45(1):59-66.
14. Verde I, Abbott AG, Scalabrin S, Jung S, Shu S, Marroni F, Zhebentyayeva T, Dettori MT, Grimwood J, Cattonaro F *et al.* The high-quality draft genome of peach (*Prunus persica*) identifies unique patterns of genetic diversity, domestication and genome evolution. *Nature genetics.* 2013; 45(5):487-94.
15. Wu J, Wang Z, Shi Z, Zhang S, Ming R, Zhu S, Khan MA, Tao S, Korban SS, Wang H *et al.* The genome of the pear (*Pyrus bretschneideri* Rehd.). *Genome Res.* 2013; 23(2):396-408.

16. Huang S, Ding J, Deng D, Tang W, Sun H, Liu D, Zhang L, Niu X, Zhang X, Meng M *et al.* Draft genome of the kiwifruit *Actinidia chinensis*. *Nature communications*. 2013; 4:2640.
17. Ming R, VanBuren R, Wai CM, Tang H, Schatz MC, Bowers JE, Lyons E, Wang M-L, Chen J, Biggers E *et al.* The pineapple genome and the evolution of CAM photosynthesis. *Nature genetics*. 2015; 47(12): 1435-42.
18. D'Hont A, Denoeud F, Aury JM, Baurens FC, Carreel F, Garsmeur O, Noel B, Bocs S, Droc G, Rouard M *et al.* The banana (*Musa acuminata*) genome and the evolution of monocotyledonous plants. *Nature*. 2012; 488(7410):213-7.
19. Ma Q, Feng K, Yang W, Chen Y, Yu F, Yin T. Identification and characterization of nucleotide variations in the genome of *Ziziphus jujuba* (Rhamnaceae) by next generation sequencing. *Mol Biol Rep*. 2014; 41(5): 3219-23.
20. Shulaev V, Sargent DJ, Crowhurst RN, Mockler TC, Folkerts O, Delcher AL, Jaiswal P, Mockaitis K, Liston A, Mane SP *et al.* The genome of woodland strawberry (*Fragaria vesca*). *Nature genetics*. 2011; 43(2):109-16.
21. Li R, Fan W, Tian G, Zhu H, He L, Cai J, Huang Q, Cai Q, Li B, Bai Y *et al.* The sequence and de novo assembly of the giant panda genome. *Nature*. 2010; 463(7279):311-7.
22. Sun L, Zhang Q, Xu Z, Yang W, Guo Y, Lu J, Pan H, Cheng T, Cai M. Genome-wide DNA polymorphisms in two cultivars of mei (*Prunus mume sieb. et zucc.*). *BMC Genet*. 2013; 14:98.
23. Brunner AM, Busov VB, Strauss SH. Poplar genome sequence: functional genomics in an ecologically dominant plant species. *Trends in plant science*. 2004; 9(1):49-56.
24. Li R, Zhu H, Ruan J, Qian W, Fang X, Shi Z, Li Y, Li S, Shan G, Kristiansen K *et al.* De novo assembly of human genomes with massively parallel short read sequencing. *Genome Res*. 2010; 20(2):265-72.
25. Du H, Hu H, Meng Y, Zheng W, Ling F, Wang J, Zhang X, Nie Q, Wang X. The correlation coefficient of GC content of the genome-wide genes is positively correlated with animal evolutionary relationships. *FEBS Lett*. 2010; 584(18):3990-4.
26. Lai Z, Lin Y. Analysis of the global transcriptome of longan (*Dimocarpus longan* Lour.) embryogenic callus using Illumina paired-end sequencing. *BMC Genomics*. 2013; 14:561.
27. Simao FA, Waterhouse RM, Ioannidis P, Kriventseva EV, Zdobnov EM. BUSCO: assessing genome assembly and annotation completeness with single-copy orthologs. *Bioinformatics*. 2015; 31(19):3210-2.
28. Lee H, Golicz AA, Bayer PE, Jiao Y, Tang H, Paterson AH, Sablok G, Krishnaraj RR, Chan CK, Batley J *et al.* The Genome of a Southern Hemisphere Seagrass Species (*Zostera muelleri*). *Plant Physiol*. 2016; 172(1): 272-83.
29. Meyers BC, Tingey SV, Morgante M. Abundance, distribution, and transcriptional activity of repetitive elements in the maize genome. *Genome*

- Res. 2001; 11(10):1660-76.
30. Velasco R, Zharkikh A, Troggio M, Cartwright DA, Cestaro A, Pruss D, Pindo M, Fitzgerald LM, Vezzulli S, Reid J *et al.* A high quality draft consensus sequence of the genome of a heterozygous grapevine variety. PLoS One. 2007; 2(12):e1326.
  31. De Bie T, Cristianini N, Demuth JP, Hahn MW. CAFE: a computational tool for the study of gene family evolution. Bioinformatics. 2006; 22(10):1269-71.
  32. Guo S, Zhang J, Sun H, Salse J, Lucas WJ, Zhang H, Zheng Y, Mao L, Ren Y, Wang Z *et al.* The draft genome of watermelon (*Citrullus lanatus*) and resequencing of 20 diverse accessions. Nature genetics. 2013; 45(1):51-8.
  33. Huang S, Li R, Zhang Z, Li L, Gu X, Fan W, Lucas WJ, Wang X, Xie B, Ni P *et al.* The genome of the cucumber, *Cucumis sativus* L. Nature genetics. 2009; 41(12):1275-81.
  34. Wang B, Tan HW, Fang W, Meinhardt LW, Mischke S, Matsumoto T, Zhang D. Developing single nucleotide polymorphism (SNP) markers from transcriptome sequences for identification of longan (*Dimocarpus longan*) germplasm. Horticulture research. 2015; 2:14065.
  35. Zhu J, Pan L, Qin X, Peng H, Wang Y, Hang Z. Analysis on genetic relations in different ecotypes of longan (*Dimocarpus longan* Lour.) germplasm resources by ISSR markers. Journal of Plant Genetic Resources. 2013; (01):65-9.
  36. Zhong F, Pan D, Guo Z, Lin L, Li K. RAPD Analysis of Longan Germplasm Resources. Chinese agricultural science bulletin. 2007; (07):558-63.
  37. Tang H, Peng J, Wang P, Risch NJ. Estimation of individual admixture: analytical and study design considerations. Genetic epidemiology. 2005; 28(4): 289-301.
  38. Peng J, Xie L, Xu B, Dang J, Li Y, Lu Z, Zhang S, Yu Z, Bai X, Cai Z. Study on Biological Characters of 'Sijihua' Longan. In: III International Symposium on Longan, Lychee, and other Fruit Trees in Sapindaceae Family 863: 2008; p.249-258.
  39. Wang L, Zhao S, Gu C, Zhou Y, Zhou H, Ma J, Cheng J, Han Y. Deep RNA-Seq uncovers the peach transcriptome landscape. Plant molecular biology. 2013; 83(4-5):365-77.
  40. Tong C, Wang X, Yu J, Wu J, Li W, Huang J, Dong C, Hua W, Liu S. Comprehensive analysis of RNA-seq data reveals the complexity of the transcriptome in *Brassica rapa*. BMC Genomics. 2013; 14:689.
  41. Liu J, Jung C, Xu J, Wang H, Deng S, Bernad L, Arenas-Huertero C, Chua NH. Genome-wide analysis uncovers regulation of long intergenic noncoding RNAs in Arabidopsis. Plant Cell. 2012; 24(11):4333-45.
  42. Wang XJ, Gaasterland T, Chua NH. Genome-wide prediction and identification of *cis*-natural antisense transcripts in *Arabidopsis thaliana*. Genome Biol. 2005; 6(4):R30.
  43. Jia T, Wei D, Meng S, Allan AC, Zeng L. Identification of regulatory genes implicated in continuous flowering of longan (*Dimocarpus longan* L.). PLoS

- One. 2014; 9(12):e114568.
44. Lin Y, Lai Z. Comparative analysis reveals dynamic changes in miRNAs and their targets and expression during somatic embryogenesis in longan (*Dimocarpus longan* Lour.). PLoS One. 2013; 8(4):e60337.
  45. Lin CC, Chung YC, Hsu CP. Potential roles of longan flower and seed extracts for anti-cancer. World Journal of Experimental Medicine. 2012; 2(4):78-85.
  46. Trapnell C, Pachter L, Salzberg SL. TopHat: discovering splice junctions with RNA-Seq. Bioinformatics. 2009; 25(9):1105-11.
  47. Clark TA, Schweitzer AC, Chen TX, Staples MK, Lu G, Wang H, Williams A, Blume JE. Discovery of tissue-specific exons using comprehensive human exon microarrays. Genome Biol. 2007; 8(4):R64.
  48. Vitulo N, Forcato C, Carpinelli EC, Telatin A, Campagna D, D'Angelo M, Zimbello R, Corso M, Vannozzi A, Bonghi C *et al.* A deep survey of alternative splicing in grape reveals changes in the splicing machinery related to tissue, stress condition and genotype. BMC Plant Biol. 2014; 14:99.
  49. Wang BB, Brendel V. Genomewide comparative analysis of alternative splicing in plants. Proceedings of the National Academy of Sciences of the United States of America. 2006; 103(18):7175-80.
  50. Filichkin SA, Priest HD, Givan SA, Shen R, Bryant DW, Fox SE, Wong WK, Mockler TC. Genome-wide mapping of alternative splicing in *Arabidopsis thaliana*. Genome Res. 2010; 20(1):45-58.
  51. Potenza E, Racchi ML, Sterck L, Coller E, Asquini E, Tosatto SC, Velasco R, Van de Peer Y, Cestaro A. Exploration of alternative splicing events in ten different grapevine cultivars. BMC Genomics. 2015; 16:706.
  52. Reddy AS, Marquez Y, Kalyna M, Barta A. Complexity of the alternative splicing landscape in plants. Plant Cell. 2013; 25(10):3657-83.
  53. Michael TP, VanBuren R. Progress, challenges and the future of crop genomes. Curr Opin Plant Biol. 2015; 24:71-81.
  54. Assis JS, Maldonado R, Muñoz T, Escribano MaI, Merodio C. Effect of high carbon dioxide concentration on PAL activity and phenolic contents in ripening cherimoya fruit. Postharvest Biology and Technology. 2001; 23(1):33-9.
  55. Togami J, Tamura M, Ishiguro K, Hirose C, Okuhara H, Ueyama Y, Nakamura N, Yonekura-Sakakibara K, Fukuchi-Mizutani M, Suzuki K-i *et al.* Molecular characterization of the flavonoid biosynthesis of *Verbena hybrida* and the functional analysis of verbena and *Clitoria ternatea* F3'5'H genes in transgenic verbena. Plant Biotechnology. 2006; 23(1):5-11.
  56. Zhang X, Gou M, Liu CJ. Arabidopsis Kelch repeat F-box proteins regulate phenylpropanoid biosynthesis via controlling the turnover of phenylalanine ammonia-lyase. Plant Cell. 2013; 25(12):4994-5010.
  57. He N, Wang Z, Yang C, Lu Y, Sun D, Wang Y, Shao W, Li Q. Isolation and identification of polyphenolic compounds in longan pericarp. Separation and Purification Technology. 2009; 70(2):219-24.
  58. Tseng HC, Wu WT, Huang HS, Wu MC. Antimicrobial activities of various



- fractions of longan (*Dimocarpus longan* Lour. Fen Ke) seed extract. International journal of food sciences and nutrition. 2014; 65(5): 589-93.
59. Dubos C, Stracke R, Grotewold E, Weisshaar B, Martin C, Lepiniec L. MYB transcription factors in Arabidopsis. Trends in plant science. 2010; 15(10): 573-81.
60. Yue JX, Meyers BC, Chen JQ, Tian D, Yang S. Tracing the origin and evolutionary history of plant nucleotide-binding site-leucine-rich repeat (NBS-LRR) genes. New Phytol. 2012; 193(4):1049-63.
61. Li J, Ding J, Zhang W, Zhang Y, Tang P, Chen JQ, Tian D, Yang S. Unique evolutionary pattern of numbers of gramineous NBS-LRR genes. Mol Genet Genomics. 2010; 283(5):427-38.
62. Yang S, Zhang X, Yue JX, Tian D, Chen JQ. Recent duplications dominate NBS-encoding gene expansion in two woody species. Mol Genet Genomics. 2008; 280(3):187-98.
63. Boetzer M, Henkel CV, Jansen HJ, Butler D, Pirovano W. Scaffolding pre-assembled contigs using SSPACE. Bioinformatics. 2011; 27(4):578-9.
64. Xu Z, Wang H. LTR\_FINDER: an efficient tool for the prediction of full-length LTR retrotransposons. Nucleic acids research. 2007; 35(Web Server issue):W265-8.
65. Jurka J, Kapitonov VV, Pavlicek A, Klonowski P, Kohany O, Walichiewicz J. Repbase Update, a database of eukaryotic repetitive elements. Cytogenetic and genome research. 2005; 110(1-4):462-7.
66. Stanke M, Keller O, Gunduz I, Hayes A, Waack S, Morgenstern B. AUGUSTUS: ab initio prediction of alternative transcripts. Nucleic acids research. 2006; 34(Web Server issue):W435-9.
67. Salamov AA, Solovyev VV. Ab initio gene finding in Drosophila genomic DNA. Genome Res. 2000; 10(4):516-22.
68. Majoros WH, Pertea M, Salzberg SL. TigrScan and GlimmerHMM: two open source ab initio eukaryotic gene-finders. Bioinformatics. 2004; 20(16): 2878-9.
69. Birney E, Clamp M, Durbin R. GeneWise and Genomewise. Genome Res. 2004;14(5):988-95.
70. Kent WJ. BLAT--the BLAST-like alignment tool. Genome Res. 2002; 12(4): 656-64.
71. Elsik CG, Mackey AJ, Reese JT, Milshina NV, Roos DS, Weinstock GM: Creating a honey bee consensus gene set. Genome Biol. 2007; 8(1):R13.
72. Zheng Y, Jiao C, Sun H, Rosli HG, Pombo MA, Zhang P, Banf M, Dai X, Martin GB, Giovannoni JJ *et al.* iTAK: A program for genome-wide prediction and classification of plant transcription factors, transcriptional regulators, and protein kinases. Mol Plant. 2016; 9(12):1667-70.
73. Varshney RK, Song C, Saxena RK, Azam S, Yu S, Sharpe AG, Cannon S, Baek J, Rosen BD, Tar'an B *et al.* Draft genome sequence of chickpea (*Cicer arietinum*) provides a resource for trait improvement. Nature biotechnology. 2013; 31(3):240-6.

- 1  
2  
3  
4  
5  
6  
7  
8  
9  
10  
11  
12  
13  
14  
15  
16  
17  
18  
19  
20  
21  
22  
23  
24  
25  
26  
27  
28  
29  
30  
31  
32  
33  
34  
35  
36  
37  
38  
39  
40  
41  
42  
43  
44  
45  
46  
47  
48  
49  
50  
51  
52  
53  
54  
55  
56  
57  
58  
59  
60  
61  
62  
63  
64  
65
74. Zdobnov EM, Apweiler R. InterProScan--an integration platform for the signature-recognition methods in InterPro. *Bioinformatics*. 2001; 17(9): 847-8.
  75. Ashburner M, Ball CA, Blake JA, Botstein D, Butler H, Cherry JM, Davis AP, Dolinski K, Dwight SS, Eppig JT *et al*. Gene ontology: tool for the unification of biology. The Gene Ontology consortium. *Nature genetics*. 2000; 25(1):25-9.
  76. Kanehisa M, Goto S. KEGG: kyoto encyclopedia of genes and genomes. *Nucleic acids research*. 2000; 28(1):27-30.
  77. Bairoch A, Apweiler R. The SWISS-PROT protein sequence database and its supplement TrEMBL in 2000. *Nucleic acids research*. 2000; 28(1):45-8.
  78. Li L, Stoekert CJ, Jr., Roos DS. OrthoMCL: identification of ortholog groups for eukaryotic genomes. *Genome Res*. 2003; 13(9):2178-89.
  79. Edgar RC. MUSCLE: multiple sequence alignment with high accuracy and high throughput. *Nucleic acids research*. 2004; 32(5):1792-7.
  80. Huelsenbeck JP, Ronquist F. MRBAYES: Bayesian inference of phylogenetic trees. *Bioinformatics*. 2001; 17(8):754-5.
  81. Soderlund C, Bomhoff M, Nelson WM. SyMAP v3.4: a turnkey synteny system with application to plant genomes. *Nucleic acids research*. 2011; 39(10):e68.
  82. Rouard M, Guignon V, Aluome C, Laporte MA, Droc G, Walde C, Zmasek CM, Perin C, Conte MG. GreenPhylDB v2.0. comparative and functional genomics in plants. *Nucleic acids research*. 2011; 39 (Database issue): D1095-102.
  83. Li S, Li R, Li H, Lu J, Li Y, Bolund L, Schierup MH, Wang J. SOAPindel: efficient identification of indels from short paired reads. *Genome Res*. 2013; 23(1):195-200.
  84. Li Y, Zheng H, Luo R, Wu H, Zhu H, Li R, Cao H, Wu B, Huang S, Shao H *et al*. Structural variation in two human genomes mapped at single-nucleotide resolution by whole genome de novo assembly. *Nature biotechnology*. 2011; 29(8):723-30.
  85. de Hoon MJ, Imoto S, Nolan J, Miyano S. Open source clustering software. *Bioinformatics*. 2004; 20(9):1453-4.
  86. Leng N, Dawson JA, Thomson JA, Ruotti V, Rissman AI, Smits BM, Haag JD, Gould MN, Stewart RM, Kendziorski C. EBSeq: an empirical Bayes hierarchical model for inference in RNA-seq experiments. *Bioinformatics*. 2013; 29(8):1035-43.
  87. Lin Y, Min J, Lai R; Wu Z, Chen Y, Yu L, Cheng C, Jin Y, Tian Q, Liu Q, Liu W, Zhang C, Lin L, Hu Y, Zhang D, Thu M, Zhang Z, Liu S, Zhong C, Fang X, Wang J, Yang H, Varshney RK, Yin Y, Lai Z (2017): Supporting data for "Genome-wide sequencing of longan (*Dimocarpus longan* Lour.) provides insights into molecular basis of its polyphenol-rich characteristics". *GigaScience Database*. <http://dx.doi.org/10.5524/100276>

**Tables****Table 1 D. *longan* genome assembly**

|                              | Contig      |        | Scaffold    |        |
|------------------------------|-------------|--------|-------------|--------|
|                              | Size(bp)    | Number | Size(bp)    | Number |
| N90                          | 6,457       | 18,861 | 122,626     | 983    |
| N80                          | 11,286      | 13,434 | 197,247     | 668    |
| N70                          | 15,938      | 9,933  | 283,489     | 459    |
| N60                          | 20,685      | 7,339  | 396,999     | 309    |
| N50                          | 26,035      | 5,306  | 566,629     | 204    |
| Longest                      | 173,288     |        | 6,942,318   |        |
| Total size                   | 471,874,380 |        | 495,332,425 |        |
| Total number( $\geq 200$ bp) |             | 51,392 |             | 17,367 |
| Total number( $\geq 2$ Kb)   |             | 27,296 |             | 2,282  |

**Table 2 Statistics and comparison of the *D. longan* assembly to other twelve genomes.** Dl, *Dimocarpus longan*; Cs, *Citrus sinensis*; Cc, *Citrus Clementina*; Cp, *Carica papaya*; Ac, *Actinidia chinensis*; Md, *Malus domestica*; Pp, *Prunus persica*; Pb, *Pyrus bretschneideri*; Vv, *Vitis vinifera*; An, *Ananas comosus (L.) Merr.*; Zj, *Ziziphus jujuba* Mill.; Mn, *Morus notabilis*; Tc, *Theobroma cacao*.

|                                               | Dl      | Cs     | Cc     | Cp     | Ac     | Md     | Pp     | Pb     | Vv     | An     | Zj     | Mn     | Tc     |
|-----------------------------------------------|---------|--------|--------|--------|--------|--------|--------|--------|--------|--------|--------|--------|--------|
| Chromosome number ( $2n$ )                    | 30      | 18     | 18     | 18     | 58     | 34     | 16     | 34     | 38     | 50     | 24     | 14     | 20     |
| Estimate of genome size (Mb)                  | 445     | 367    | 370    | 372    | 758    | 742.3  | 265    | 527    | 475    | 526    | 444    | 357    | 430    |
| Sequence Coverage                             | 273.43  | 214    | 7      | NA     | 140    | 16.9   | 8.47   | 194    | 8.4    | 400    | 390    | 236    | 16.7   |
| Assembled (Mb)                                | 471.88  | 320    | 301    | 271    | 616.1  | 603.9  | 226.6  | 512    | 487    | 382    | 437.65 | 330    | 326.9  |
| Assembling represent percentage of genome (%) | 106.4   | 87.30  | 81.4   | 75     | 81     | 81.3   | 85.50  | 97.10  | 102.5  | 73     | 98.60  | 92.4   | 76     |
| N50 length of contig (Kb)                     | 26.03   | 49.89  | NA     | NA     | 58.9   | 16.17  | 294    | 35.7   | 65.9   | 126.5  | 33.9   | 34.4   | 19.8   |
| N50 length of scaffolds (Mb)                  | 0.56662 | 1.69   | NA     | NA     | 0.646  | NA     | 4      | 0.54   | 2      | 11.8   | 0.3    | 0.39   | 0.4738 |
| GC content (%)                                | 33.7    | 34.06  | NA     | 35.3   | 35.20  | NA     | NA     | NA     | 35     | 33     | 33.41  | 35     | NA     |
| Repeat content (%)                            | 52.87   | 20     | NA     | 51.90  | 36     | 67.4   | 29.60  | 53.10  | 41.40  | 38.30  | 49.49  | 38.8   | 25.70  |
| Number of gene models                         | 31,007  | 29,445 | 24,533 | 24,746 | 39,040 | 57,386 | 27,852 | 42,812 | 30,434 | 27,024 | 32,808 | 27,085 | 28,798 |

NA, no available.

**Figure 1 Phylogenetic and evolutionary analysis of the longan genome.** (a) Molecular phylogenetic analysis based on single-copy genes shared among orange, papaya, Arabidopsis, cacao, poplar, banana, grape, soybean, apple, peach, kiwifruit, and banana from genome data. (b) Comparison of the number of gene families in eleven plant species, such as *T. cacao*, *A. thaliana*, *C. sinensis*, *C. papaya*, *P. trichocarpa*, *G. max*, *V. vinifera*, *M. acuminata*, *D. longan*, *P. persica*, *A. chinensis*, and *M. domestica*. (c) Distribution of 4DTv distance between syntenic gene pairs among banana, peach, orange, Arabidopsis and grape. (d) Distribution of gene families among *D. longan*, *C. sinensis*, *C. papaya*, *V. vinifera*, and *P. persica*. Homologous genes in longan, orange, papaya, grape, and peach were clustered to gene families. The numbers of gene families are indicated for each species and species intersection.

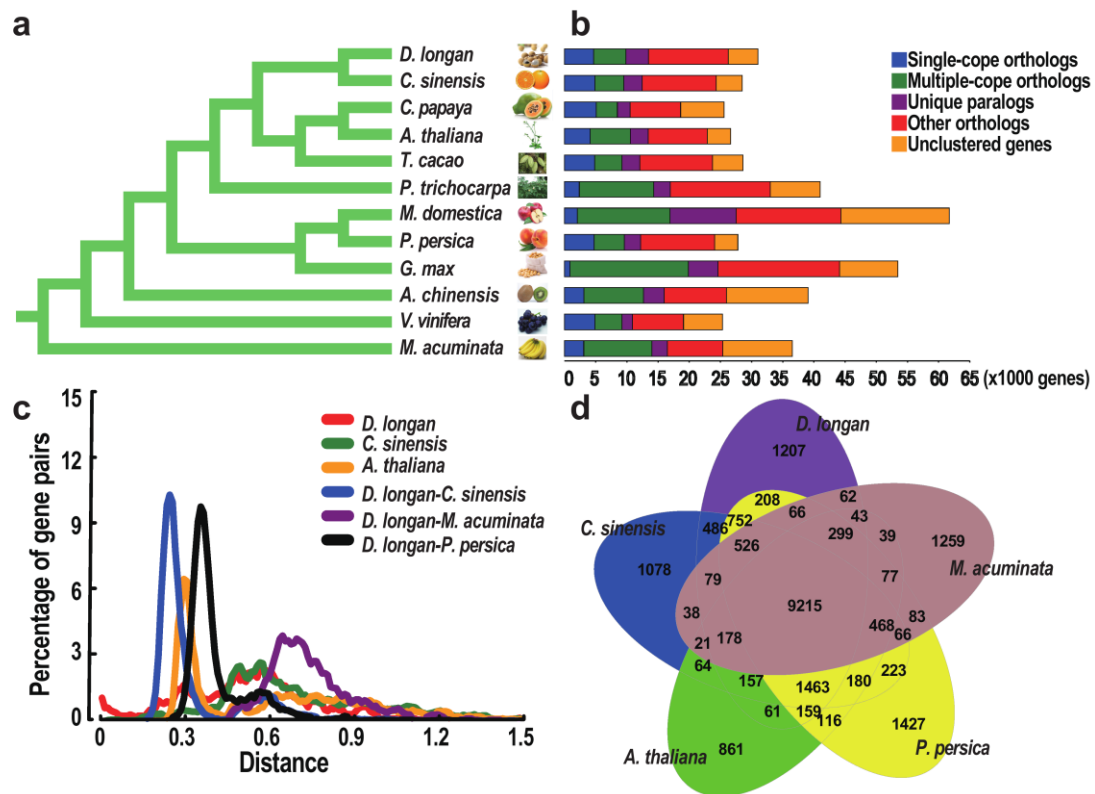

**Figure 2 Genetic diversity and population structure of longan accessions.** (a) Neighbor- joining tree of the 13 longan accessions on the basis of all SNPs. (b) PCA of the 13 longan accessions using SNPs as markers. Different colors represent for different longan accession. HHZ, DB, JYW, LDB, WLL, SN1H, YTB, SEY, JHLY, and SX, are clustered together, FY (Quanzhou, China), SJM (South-East Asia), and MQ (Thailand) showed a clear separation. (c) Population structure of longan accessions. The distribution of the accessions to different populations is indicated by different color. Each accession is represented by a vertical bar. Numbers on the x-axis show represents the K number, and the y-axis shows the different accession.

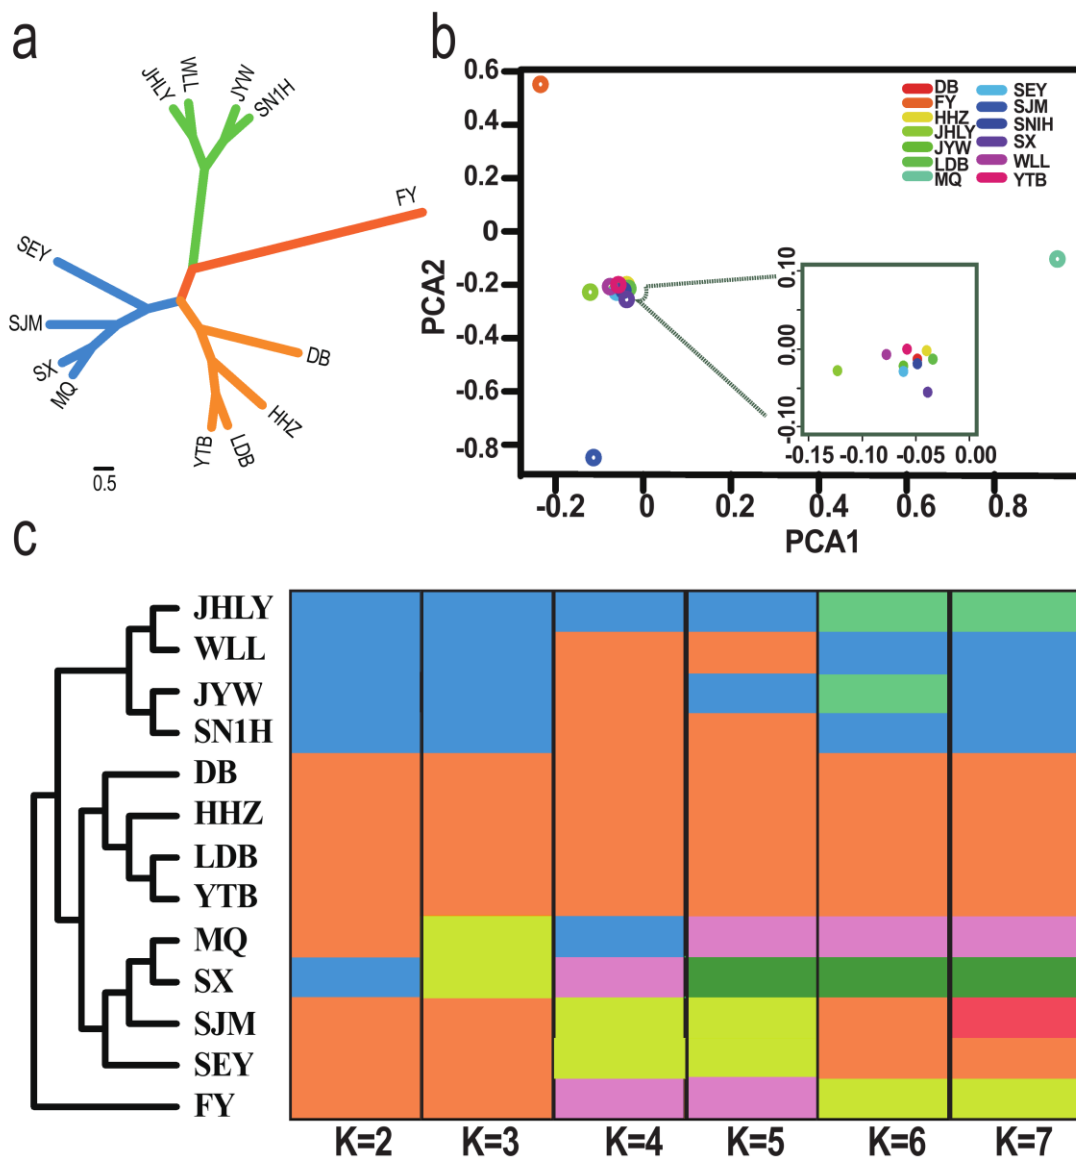

**Figure 3 Simplified diagram of polyphenols biosynthetic pathway.** (a) Simplified diagram of polyphenols biosynthetic pathway. Numbers in brackets represent genes' copy number. (b) PCA scatter plot of 9 samples using genes related to polyphenols biosynthetic pathway. (c) Neighbor-joining tree of the *F3'H*, *ANR*, and *LAR* from longan, peach, orange, Arabidopsis and grape. (d) Cluster analysis of expression profiles of *F3'H*, *ANR*, and *LAR*. The bar represents the scale of relative expression levels of genes, and colors indicate relative signal intensities of genes. Each column represents a sample, and each row represents a single gene.

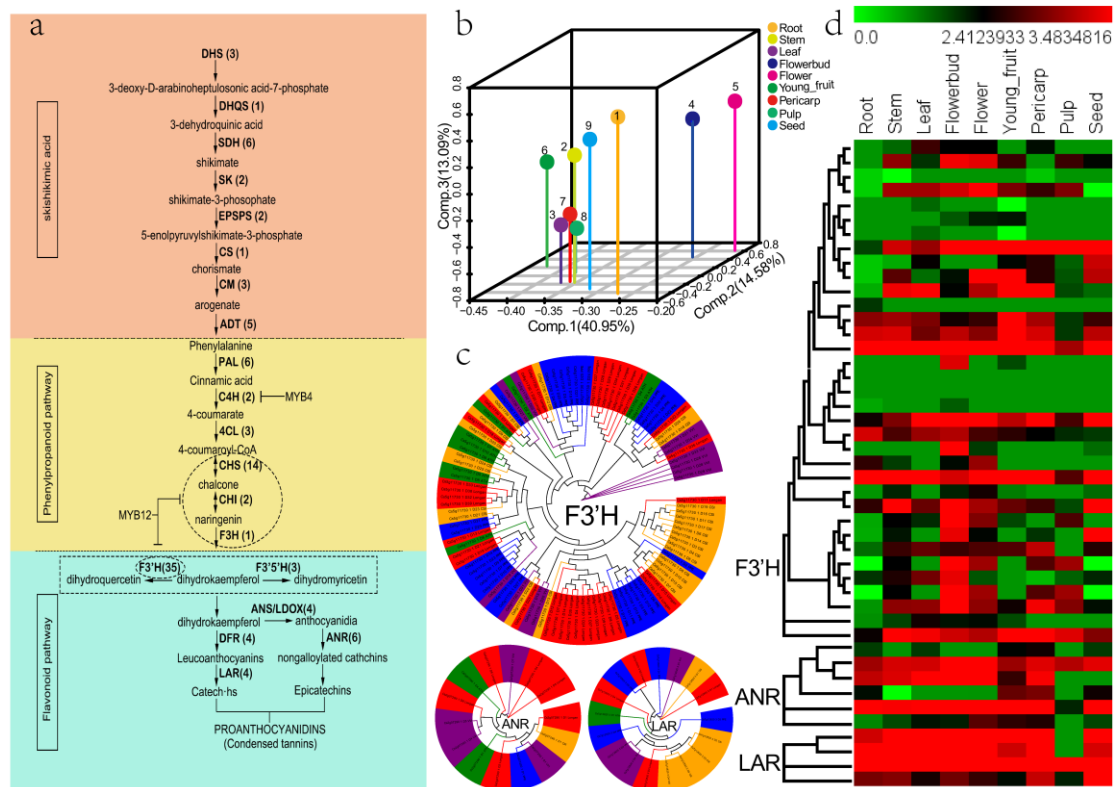

**Figure 4 The MYB transcription factor in longan genome.** (a) Numbers of the members in the three different MYB classes in Arabidopsis, orange, longan, peach, and grape. (b) Neighbor-joining tree of the MYB gene family. (c) PCA scatter plot of 9 samples using 94 R2R3-MYB genes. (d) Cluster analysis of expression profiles of MYB transcription factor. The bar represents the scale of relative expression levels of genes, and colors indicate relative signal intensities of genes. Each column represents a sample, and each row represents a single gene.

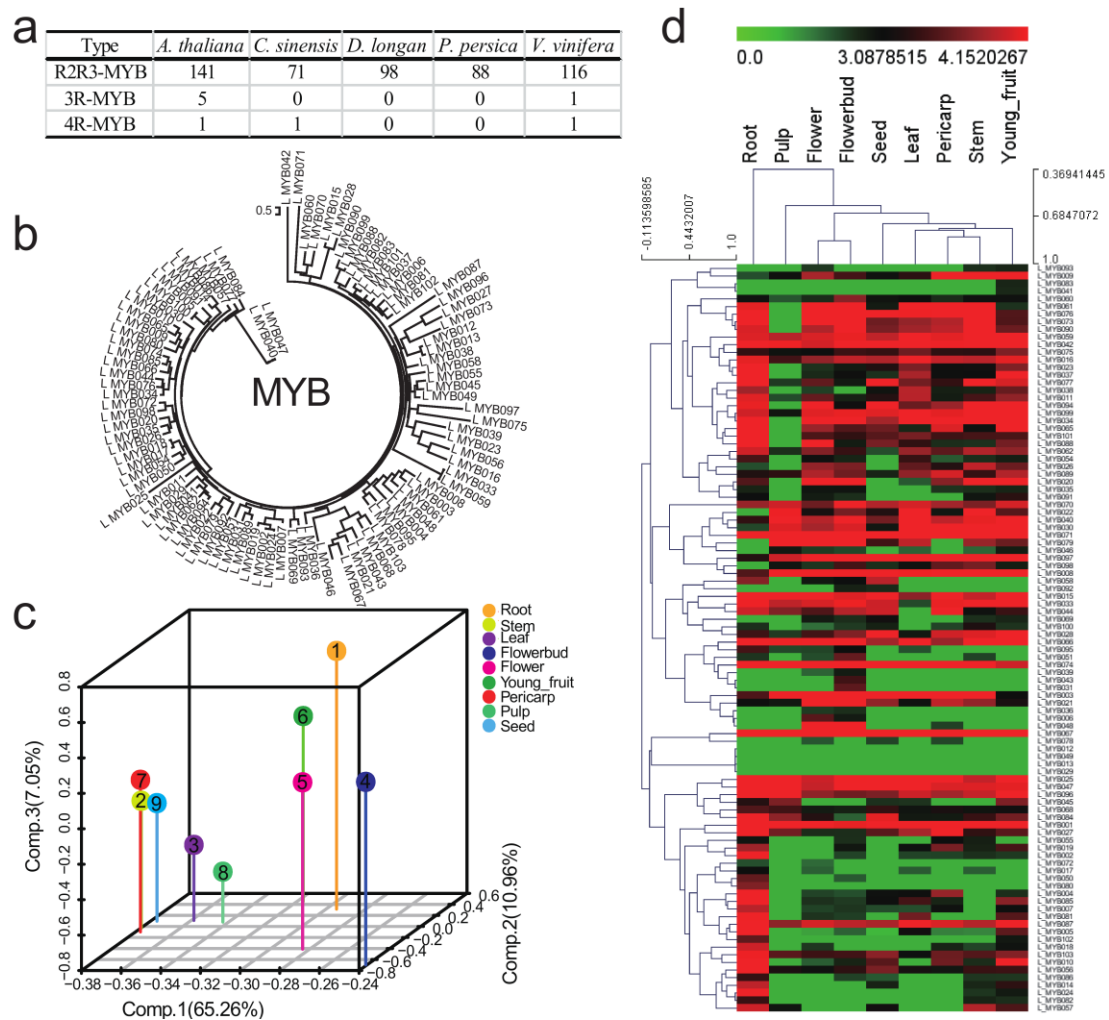





Click here to access/download  
**Supplementary Material**  
Additional file 1-1.17.doc



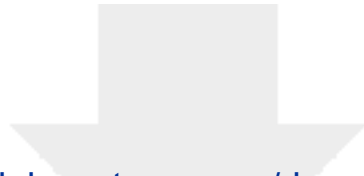

Click here to access/download  
**Supplementary Material**  
Additional file 2-12.9.doc

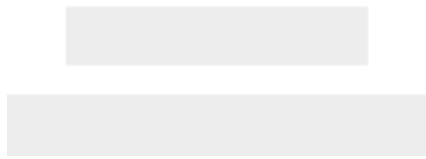

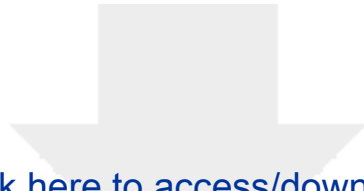

Click here to access/download  
**Supplementary Material**  
Supplementary EXCEL file 1.xls

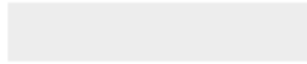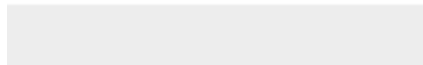



Click here to access/download  
**Supplementary Material**  
Supplementary EXCEL file 2 .xls

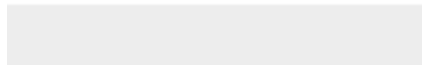

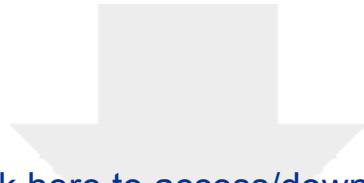

Click here to access/download  
**Supplementary Material**  
Supplementary EXCEL file 3.xls

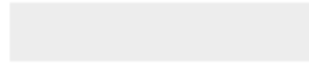



Click here to access/download  
**Supplementary Material**  
Supplementary EXCEL file 4.xls

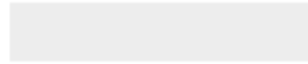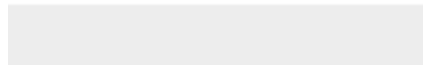



Click here to access/download  
**Supplementary Material**  
Supplementary EXCEL file 5.xls





Click here to access/download  
**Supplementary Material**  
Supplementary EXCEL file 6.xls







Click here to access/download  
**Supplementary Material**  
Supplementary EXCEL file 7.xls

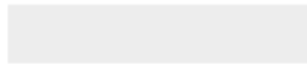

Supplementary EXCEL file 8 MYB genes expressed in nine  
different tissues of *Dimocarpus longan*



Click here to access/download  
**Supplementary Material**  
Supplementary EXCEL file 8.xls



Supplement: gix023_GIGA-D-16-00042_Revision_3.pdf [file gix023_GIGA-D-16-00042_Revision_3.pdf]
